# Supplementary material for: Chemoselective Cu-catalyzed synthesis of diverse N-arylindole carboxamides, β-oxo amides and N-arylindole-3-carbonitriles using diaryliodonium salts
Source: Royal Society of Chemistry journal article supplement (doi:10.1039/d0ob02247k), 2020-12-30
Supplement: d0ob02247k1.pdf [file d0ob02247k1.pdf]

# Chemoselective Cu-Catalyzed Synthesis of Diverse *N*-Arylindole carboxamides, $\beta$ -Oxo amides and *N*-Arylindole-3-carbonitriles using Diaryliodonium Salts

Manish Kumar Mehra, Monika Malik, Bintu Kumar and Dalip Kumar\*

Department of Chemistry, Birla Institute of Technology and Science, Pilani 333 031, Rajasthan, India

[dalipk@pilani.bits-pilani.ac.in](mailto:dalipk@pilani.bits-pilani.ac.in)

## Supplementary Information

### Table of Contents

|                                                         |     |
|---------------------------------------------------------|-----|
| 1. General Informations                                 | S2  |
| 2. Experimental Procedures                              | S2  |
| 3. Characterization Data                                | S5  |
| 4. Copies of $^1\text{H}$ & $^{13}\text{C}$ NMR spectra | S11 |
| 5. References                                           | S39 |

## 1. General Informations

All the laboratory reagents were purchased from Sigma-Aldich, Alfa Aesar and Spectrochem India Pvt. Ltd and used without further purification. The reactions were monitored by thin layer chromatography and performed on Merck pre-coated plates (silica gel 60 F<sub>254</sub>, 0.2mm). Column chromatographic purification of products was carried out using silica gel (100-200 mesh) and ethyl acetate/hexane mixture was used for elution. <sup>1</sup>H NMR spectra and <sup>13</sup>C NMR spectra were recorded at 400 MHz and 100 MHz using CDCl<sub>3</sub> and DMSO-*d*<sub>6</sub> solutions. Chemical shifts are given in ppm relative to the residual solvent peak (<sup>1</sup>H NMR: CDCl<sub>3</sub> δ 7.26; DMSO-*d*<sub>6</sub> δ 2.50; <sup>13</sup>C NMR: CDCl<sub>3</sub> δ 77.0; DMSO-*d*<sub>6</sub> δ 39.52) with multiplicity (s = singlet, d = doublet, t = triplet, q = quartet, m = multiplet), coupling constants (*J*, in Hz) and integration. Melting points were determined by using E-Z melting point apparatus and are uncorrected. High-resolution mass data were obtained on an Agilent 6545 Q-TOF LC/MS (ESI). Infrared spectra were recorded on Shimadzu IR Prestige-21 FT-IR spectrophotometer. Used α-cyano ketones and diaryliodonium salts were prepared according to literature reported methods.<sup>1</sup>

## 2. Experimental Procedures

**A. General procedure for the synthesis of indole-3-carbonitriles (9a-e):**<sup>2</sup> Indole-3-carboxaldehyde was synthesized from commercially available indole *via* Vilsmeier-Haack formylation as reported in the literature.<sup>3</sup>

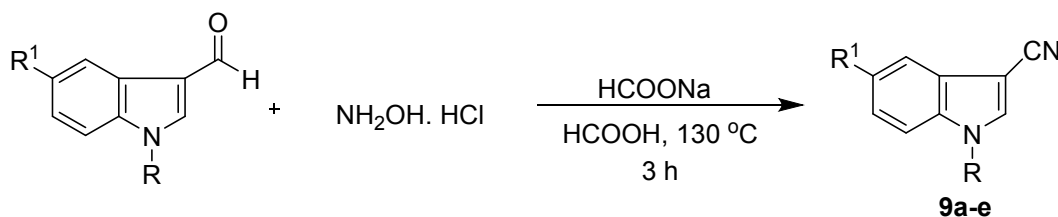

A round-bottom flask was successively charged with a mixture of indole-3-carboxaldehydes (13.78 mmol, 1.0 equiv), hydroxylamine hydrochloride (13.78 mmol, 1.0 equiv), and sodium formate (27.56 mmol, 2.0 equiv) dissolved in 15 mL of formic acid. The mixture was stirred for about 3 h at 130 °C until TLC revealed the complete consumption of the starting material. The reaction mixture was cooled to room temperature and poured into ice-cold water (150 mL) and

organic layer was extracted in dichloromethane (2 × 40 mL). The extracted organic layer was washed with saturated sodium bicarbonate (50 mL) and brine (50 mL) solution. Evaporated the organic phase under reduced pressure and the residue obtained was purified by silica gel column chromatography (ethyl acetate: hexane as eluent) to obtain pure indole-3-carbonitriles **9a-e** (65-70% yields).

**B. General experimental procedure for *N*-arylindole-carboxamides (**11a-k**), *N*-phenyl- $\beta$ -ketoamides (**13a-d**) and cephalandole A analogue (**15**):** To the mixture indole-3-carbonitrile **9** or  $\alpha$ -cyano ketones **12** (0.70 mmol, 1.0 equiv), copper(II)triflate (0.07 mmol) and diaryliodonium salts (**10**, 0.84 mmol, 1.2 equiv) were dissolved in DCE (2.5 mL, contains 0.1% v/v H<sub>2</sub>O) under N<sub>2</sub> atmosphere. The resulting reaction mixture was stirred at 80 °C for 12 h in presence of inert (N<sub>2</sub>) atmosphere. After completion of the reaction as indicated by TLC, the contents were cooled to room temperature and evaporated the solvent under reduced pressure. The obtained crude residue was purified by column chromatography using ethyl acetate and hexane as an eluent to obtain pure products **11a-k**, **13a-d** and **15**.

**C. General experimental procedure for the synthesis of *N*-arylindole-carbonitriles (**14a-c**):** A 10 mL round bottom flask was charged with indole-3-carbonitrile (**9a**, (0.70 mmol, 1.0 equiv), Cu(OTf)<sub>2</sub> (0.07 mmol, 10 mol%), *N,N*-diisopropylethylamine (2.1 mmol, 3.0 equiv), and the corresponding diaryliodonium salt (**10**, 0.84 mmol, 1.2 equiv). 1,2-Dichloroethane (2.5 mL) was then added to the flask. The reaction mixture was stirred at 80 °C for 12 h under nitrogen atmosphere. After completion of the reaction as indicated by TLC analysis, the solvent was removed in vacuo and the residue was purified by column chromatography on silica gel (ethyl acetate: hexane as eluent) to obtain the desired product **14a**.

**D. Experimental procedure for the reduction of indole-3-carboxamide **11a**:** To a mixture of indole-3-carboxamide **11a** (50 mg, 0.21 mmol) in anhydrous THF (5 mL), LiAlH<sub>4</sub> (0.53 mmol, 2.5 equiv) was added in one portion. The resulting reaction mixture was refluxed for 4 h (the reaction was closely monitored by TLC). Upon completion of the reaction, the contents were cooled to room temperature and carefully quenched with the addition of water (6.0 mL). The organic layer was then extracted with ethyl acetate (3.0 mL × 3) and the combined organic layer was dried over anhydrous Na<sub>2</sub>SO<sub>4</sub>. Organic layer was concentrated at reduced pressure, the

crude product was purified by column chromatography eluting with hexane and ethyl acetate (6 : 4) to obtain pure **16** in 42% yield.

**E. Experimental procedure for indoloquinolone 17:** A suspension of 1-methyl-*N*-phenyl-1*H*-indole-3-carboxamide **11j** (50 mg, 0.20 mmol), AgTFA (44.2 mg, 0.2 mmol), Pd(OAc)<sub>2</sub> (2.2 mg, 0.01 mmol) in AcOH (1.0 mL) was stirred at 120 °C for 12 h. After completion of the reaction, the contents were cooled to room temperature and basified with saturated aqueous solution of NaHCO<sub>3</sub>, followed by organic layer was extracted with ethyl acetate (3 × 3 mL). The combined organic layers were dried over Na<sub>2</sub>SO<sub>4</sub> and evaporated under reduced pressure to give the crude product which was purified by column chromatography on silica gel (*n*-hexane/EtOAc: 50/50) to yield the pure products **17** in 72% yield.

**F. Experimental procedure for indoloquinolone 18:** To a solution of **11k** (100 mg, 0.42 mmol) in dry THF (4.0 mL) were added NaH (20 mg, 0.84 mmol) and followed by methyl iodide (0.08 mL, 1.26 mmol) at 0 °C. Resulting solution was refluxed for 4 h. After completion of the reaction, solvent was removed at rotavapor and then water (5.0 mL) was added carefully in the reaction mixture. The organic layer was separated in DCM (1.5 mL × 3) and then dried over Na<sub>2</sub>SO<sub>4</sub>. After evaporation of the solvent in vacuum, obtained *N*,1-dimethyl-*N*-phenyl-1*H*-indole-3-carboxamide was used for next step without any further purification.

Obtained *N*,1-dimethyl-*N*-phenyl-1*H*-indole-3-carboxamide (0.37 mmol) and Pd(OAc)<sub>2</sub> (0.037 mmol, 0.1 equiv), *t*-BuOK (0.074 mmol, 0.2 equiv), AgOAc (1.11 mmol, 3.0 equiv) were taken in 2.5 mL mixture of pivalic acid and acetic acid (3 : 1). The resulting solution was heated at 130 °C for 12 h. After completion of the reaction (as indicated by TLC), mixture was cooled down to room temperature and added a saturated solution of sodium carbonate. Organic layer was extracted with dichloromethane and removal of excess solvent gave crude product. Column chromatography of the crude product on silica gel using ethyl acetate and hexane (4 : 6) as eluant afforded **18** with overall 65% yield.

### 3. Characterization data

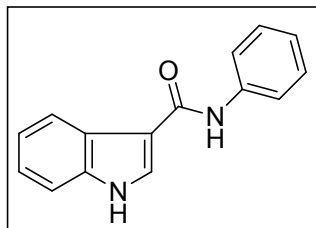

**N-Phenyl-1H-indolyl-3-carboxamide (11a):** White solid, 91% yield, mp 172–173 °C (lit. mp 173-175 °C)<sup>4</sup>. <sup>1</sup>H NMR (400 MHz, DMSO-*d*<sub>6</sub>) δ 11.75 (s, 1H), 9.72 (s, 1H), 8.31 (d, *J* = 2.4 Hz, 1H), 8.21 (d, *J* = 7.5 Hz, 1H), 7.78 (d, *J* = 7.8 Hz, 2H), 7.48 (d, *J* = 7.6 Hz, 1H), 7.34 (t, *J* = 7.6 Hz, 2H), 7.22 – 7.14 (m, 2H), 7.05 (t, *J* = 7.2 Hz, 1H); <sup>13</sup>C NMR (100 MHz, DMSO-*d*<sub>6</sub>) δ 163.7, 140.3, 136.7, 129.1, 129.0, 126.9, 123.1, 122.6, 121.5, 121.1, 120.2, 112.4, 111.0; IR (neat, cm<sup>-1</sup>): 3375, 3248, 1643, 1602.

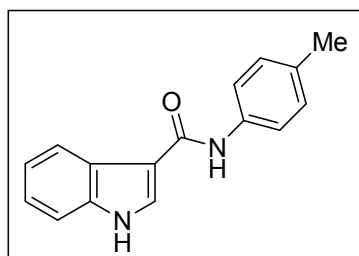

**N-(p-Tolyl)-1H-indole-3-carboxamide (11b):** Off-white solid, 89% yield, mp 200–201 °C (lit. mp 200.9-201.1 °C)<sup>5</sup>. <sup>1</sup>H NMR (400 MHz, DMSO-*d*<sub>6</sub>) δ 11.71 (s, 1H), 9.64 (s, 1H), 8.27 (d, *J* = 3.0 Hz, 1H), 8.19 (d, *J* = 7.4 Hz, 1H), 7.65 (d, *J* = 8.4 Hz, 2H), 7.47 (d, *J* = 7.7 Hz, 1H), 7.21 – 7.12 (m, 4H), 2.28 (s, 3H); <sup>13</sup>C NMR (100 MHz, DMSO-*d*<sub>6</sub>) δ 163.6, 137.7, 136.6, 131.9, 129.4, 128.9, 126.9, 122.5, 121.5, 121.0, 120.2, 112.4, 111.0, 20.9; IR (neat, cm<sup>-1</sup>): 3377, 3247, 1642, 1238.

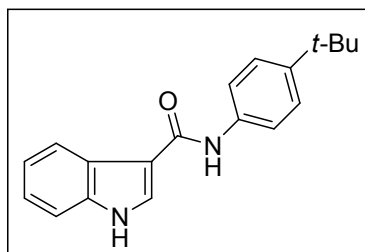

**N-(4-(tert-Butyl)phenyl)-1H-indole-3-carboxamide (11c):** Off-white solid, 80% yield, mp 185–186 °C; <sup>1</sup>H NMR (400 MHz, DMSO-*d*<sub>6</sub>) δ 11.72 (s, 1H), 9.66 (s, 1H), 8.29 (d, *J* = 2.9 Hz, 1H), 8.21 (d, *J* = 7.4 Hz, 1H), 7.69 (d, *J* = 8.7 Hz, 2H), 7.47 (d, *J* = 7.7 Hz, 1H), 7.35 (d, *J* = 8.7 Hz, 2H), 7.22 – 7.12 (m, 2H), 1.29 (s, 9H); <sup>13</sup>C NMR (100 MHz, DMSO-*d*<sub>6</sub>) δ 163.6, 145.3, 137.7, 136.7, 128.9, 126.9, 125.6, 122.5, 121.6, 121.0, 120.0, 112.4, 111.0, 34.4, 31.7; IR (neat, cm<sup>-1</sup>): 3213, 1636, 1234, 745; HRMS (ESI) *m/z* calcd for C<sub>19</sub>H<sub>21</sub>N<sub>2</sub>O: 293.1648 (M + H)<sup>+</sup>, found: 293.1642.

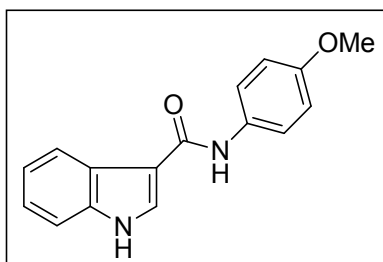

**N-(4-Methoxyphenyl)-1H-indole-3-carboxamide (11d):** Off-white solid, 82% yield, mp 201–202 °C (lit. mp 200-202 °C)<sup>6</sup>. <sup>1</sup>H NMR (400 MHz, DMSO-*d*<sub>6</sub>) δ 11.71 (s, 1H), 9.63 (s, 1H), 8.26 (d, *J* = 3.0 Hz, 1H), 8.20 (d, *J* = 7.4 Hz, 1H), 7.69 – 7.66 (m, 2H), 7.47 (d, *J* = 7.7 Hz, 1H), 7.21 – 7.12 (m, 2H), 6.92 (d, *J* = 9.1 Hz, 2H), 3.75

(s, 3H);  $^{13}\text{C}$  NMR (100 MHz,  $\text{DMSO-}d_6$ )  $\delta$  163.5, 155.3, 136.7, 133.3, 128.8, 126.9, 122.5, 121.8, 121.6, 121.0, 114.2, 112.4, 111.1, 55.6; IR (neat,  $\text{cm}^{-1}$ ): 3398, 3217, 1631, 1236.

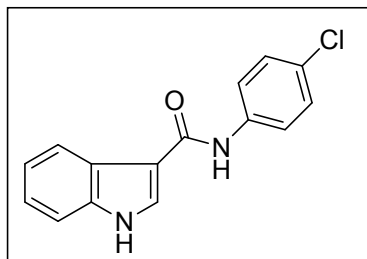

**N-(4-Chlorophenyl)-1H-indole-3-carboxamide (11e):** Off-white solid, 75% yield, mp 224–225 °C (lit. mp 225–226 °C)<sup>6</sup>.  $^1\text{H}$  NMR (400 MHz,  $\text{DMSO-}d_6$ )  $\delta$  8.25 (s, 1H), 8.16 (d,  $J$  = 7.5 Hz, 1H), 7.77 (d,  $J$  = 8.9 Hz, 2H), 7.48 (d,  $J$  = 7.8 Hz, 1H), 7.37 (d,  $J$  = 8.9 Hz, 2H), 7.22 – 7.14 (m, 2H);  $^{13}\text{C}$  NMR (100 MHz,  $\text{DMSO-}d_6$ )  $\delta$  163.8, 138.9, 136.5, 129.3, 129.1, 128.9, 126.8, 126.6, 122.9, 121.7, 121.4, 112.5, 110.5; IR (neat,  $\text{cm}^{-1}$ ): 3410, 3118, 1641, 1233.

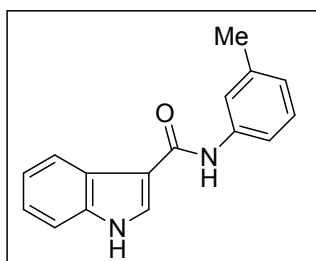

**N-(*m*-Tolyl)-1H-indole-3-carboxamide (11f):** Off-white solid, 86% yield, mp 196–197 °C;  $^1\text{H}$  NMR (400 MHz,  $\text{DMSO-}d_6$ )  $\delta$  11.73 (s, 1H), 9.64 (s, 1H), 8.30 (d,  $J$  = 3.0 Hz, 1H), 8.21 (d,  $J$  = 7.4 Hz, 1H), 7.64 (s, 1H), 7.57 (d,  $J$  = 8.2 Hz, 1H), 7.48 (d,  $J$  = 7.6 Hz, 1H), 7.23 – 7.13 (m, 3H), 6.86 (d,  $J$  = 7.5 Hz, 1H), 2.32 (s, 3H);  $^{13}\text{C}$  NMR (100 MHz,  $\text{DMSO-}d_6$ )  $\delta$  163.7, 140.2, 138.1, 136.7, 129.0, 128.8, 126.90, 123.8, 122.6, 121.6, 121.1, 120.7, 117.3, 112.4, 111.0, 21.7; IR (neat,  $\text{cm}^{-1}$ ): 3379, 3231, 1642, 1235; HRMS (ESI)  $m/z$  calcd for  $\text{C}_{16}\text{H}_{15}\text{N}_2\text{O}$ : 251.1179 ( $\text{M} + \text{H}$ )<sup>+</sup>, found: 251.1175.

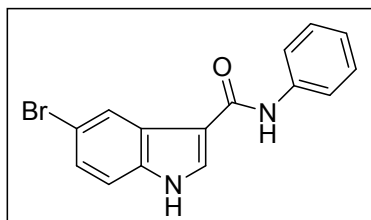

**5-Bromo-N-phenyl-1H-indole-3-carboxamide (11g):** Off-white solid, 75% yield, mp 220–221 °C;  $^1\text{H}$  NMR (400 MHz,  $\text{DMSO-}d_6$ )  $\delta$  11.95 (s, 1H), 9.80 (s, 1H), 8.37 – 8.35 (m, 2H), 7.76 (d,  $J$  = 7.6 Hz, 2H), 7.47 (d,  $J$  = 8.6 Hz, 1H), 7.36 – 7.30 (m, 3H), 7.06 (t,  $J$  = 7.4 Hz, 1H);  $^{13}\text{C}$  NMR (100 MHz,  $\text{DMSO}$ )  $\delta$  163.3, 140.0, 135.4, 130.4, 129.0, 128.7, 125.2, 123.7, 123.3, 120.3, 114.5, 114.0, 110.5; IR (neat,  $\text{cm}^{-1}$ ): 3402, 3290, 1641; HRMS (ESI)  $m/z$  calcd for  $\text{C}_{15}\text{H}_{12}\text{BrN}_2\text{O}$ : 315.0128 ( $\text{M} + \text{H}$ )<sup>+</sup>, found: 315.0118.

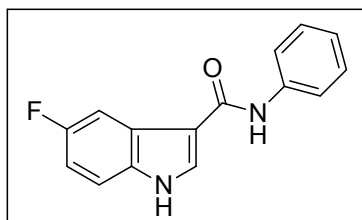

**5-Fluoro-N-phenyl-1H-indole-3-carboxamide (11h):** Off-white solid, 70% yield, mp 211–213 °C;  $^1\text{H}$  NMR (400 MHz,  $\text{DMSO-}d_6$ )  $\delta$  9.81 (s, 1H), 8.33 (s, 1H), 7.85 (dd,  $J$  = 10.2, 2.6 Hz, 1H), 7.71 (d,  $J$  = 7.6 Hz, 2H), 7.49 (dd,  $J$  = 8.9, 4.6 Hz, 1H), 7.33 (t,  $J$  = 7.9 Hz, 2H),

7.08 – 7.03 (m, 2H);  $^{13}\text{C}$  NMR (100 MHz,  $\text{DMSO-}d_6$ )  $\delta$  163.6, 158.39 (d,  $J_F = 231.8$  Hz), 139.7, 133.1, 130.5, 129.1, 127.26 (d,  $J_F = 11.0$  Hz), 123.5, 120.3, 113.64 (d,  $J_F = 9.9$  Hz), 111.05 (d,  $J_F = 26.1$  Hz), 110.8 (d,  $J_F = 4.6$  Hz), 106.14 (d,  $J_F = 24.5$  Hz); IR (neat,  $\text{cm}^{-1}$ ): 3411, 3296, 1642; HRMS (ESI)  $m/z$  calcd for  $\text{C}_{15}\text{H}_{12}\text{FN}_2\text{O}$ : 255.0928 ( $\text{M} + \text{H}$ ) $^+$ , found: 255.0920.

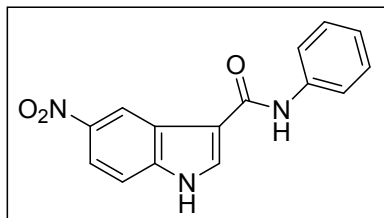

**5-Nitro-*N*-phenyl-1*H*-indole-3-carboxamide(11i):** Off-white solid, 78% yield, mp 272–273 °C;  $^1\text{H}$  NMR (400 MHz,  $\text{DMSO-}d_6$ )  $\delta$  12.40 (s, 1H), 9.97 (s, 1H), 9.13 (d,  $J = 2.3$  Hz, 1H), 8.56 (d,  $J = 2.9$  Hz, 1H), 8.10 (dd,  $J = 9.0, 2.4$  Hz, 1H), 7.78 (d,  $J = 7.6$  Hz, 2H), 7.69 (d,  $J = 9.0$  Hz, 1H), 7.38 – 7.34 (m, 2H), 7.08 (t,  $J = 6.9$  Hz,

1H);

$^{13}\text{C}$  NMR (100 MHz,  $\text{DMSO-}d_6$ )  $\delta$  162.8, 142.4, 139.8, 132.6, 129.1, 127.1, 126.3, 123.6, 120.4, 118.3, 118.0, 113.2, 112.9; IR (neat,  $\text{cm}^{-1}$ ): 3428, 3290, 1645, 1523, 1485; HRMS (ESI)  $m/z$  calcd for  $\text{C}_{15}\text{H}_{12}\text{N}_3\text{O}_3$ : 282.0873 ( $\text{M} + \text{H}$ ) $^+$ , found: 282.0869.

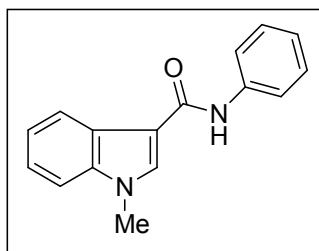

**1-Methyl-*N*-phenyl-1*H*-indole-3-carboxamide (11j):** Off-white solid, 85% yield, mp 172–173 °C (lit. mp 172-173 °C);<sup>7</sup>  $^1\text{H}$  NMR (400 MHz,  $\text{DMSO-}d_6$ )  $\delta$  9.74 (s, 1H), 8.27 (s, 1H), 8.21 (d,  $J = 7.6$  Hz, 1H), 7.77 (d,  $J = 7.6$  Hz, 2H), 7.54 (d,  $J = 8.1$  Hz, 1H), 7.33 (t,  $J = 7.6$  Hz, 2H), 7.27 – 7.25 (m, 1H), 7.22 – 7.18 (m, 1H), 7.04 (t,  $J = 7.4$  Hz, 1H), 3.89 (s, 3H);

$^{13}\text{C}$  NMR (100 MHz,  $\text{DMSO-}d_6$ )  $\delta$  163.3, 140.3, 137.3, 132.9, 129.0, 127.2, 123.1, 122.7, 121.7, 121.4, 120.1, 110.8, 110.0, 33.6; IR (neat,  $\text{cm}^{-1}$ ): 3290, 1638.

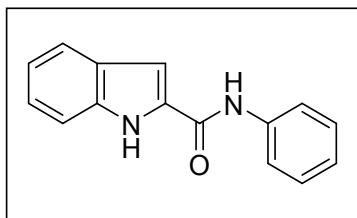

***N*-Phenyl-1*H*-indole-2-carboxamide (11k):** Pale yellow solid, 81% yield, mp 194-195 °C (lit. mp 192-193 °C)<sup>8</sup>.  $^1\text{H}$  NMR (400 MHz,  $\text{DMSO-}d_6$ )  $\delta$  11.75 (s, 1H), 10.22 (s, 1H), 7.82 (d,  $J = 8.8, 1.2$  Hz, 2H), 7.69 (d,  $J = 8.0$  Hz, 1H), 7.49 – 7.44 (m, 2H), 7.40 – 7.36 (m, 2H), 7.25 – 7.21 (m, 1H), 7.14 – 7.06 (m, 2H);  $^{13}\text{C}$  NMR (100 MHz,

$\text{DMSO-}d_6$ )  $\delta$  160.2, 139.4, 137.3, 131.9, 129.2, 127.5, 124.2, 124.0, 122.2, 120.6, 120.4, 112.9, 104.3; IR (neat,  $\text{cm}^{-1}$ ): 3428, 3341, 1648.

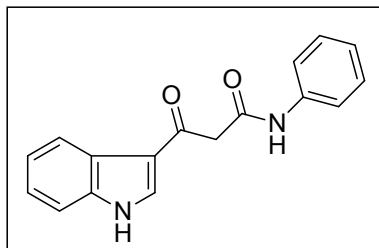

### 3-(1H-Indol-3-yl)-3-oxo-N-phenylpropanamide(13a):

Light brown solid, 75% yield, mp 214–215 °C;  $^1\text{H}$  NMR (400 MHz, DMSO- $d_6$ )  $\delta$  12.06 (s, 1H), 10.20 (s, 1H), 8.43 (d,  $J$  = 3.1 Hz, 1H), 8.19 (d,  $J$  = 7.0 Hz, 1H), 7.62 (d,  $J$  = 7.7 Hz, 2H), 7.50 (d,  $J$  = 8.1 Hz, 1H), 7.32 (t,  $J$  = 7.9 Hz, 2H), 7.26 – 7.19 (m, 2H), 7.06 (t,  $J$  = 7.4 Hz, 1H), 3.99 (s, 2H);  $^{13}\text{C}$  NMR (100 MHz, DMSO- $d_6$ )  $\delta$  189.2, 166.3, 139.6, 137.1, 135.7, 129.2, 125.8, 123.7, 123.5, 122.4, 121.7, 119.5, 116.8, 112.7, 49.3; IR (neat,  $\text{cm}^{-1}$ ): 3310, 1667, 1601, 1420, 1339, 1173; HRMS (ESI)  $m/z$  calcd for  $\text{C}_{17}\text{H}_{15}\text{N}_2\text{O}_2$ : 279.1128 ( $\text{M} + \text{H}$ ) $^+$ , found: 279.1126.

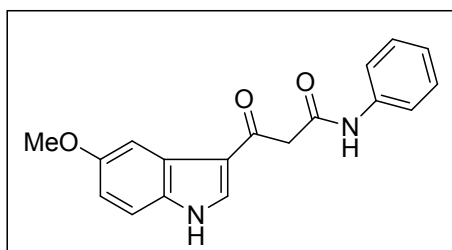

### 3-(5-Methoxy-1H-indol-3-yl)-3-oxo-N-phenylpropanamide

(13b): Light brown solid, 70% yield, mp 208–210 °C;  $^1\text{H}$  NMR (400 MHz, DMSO- $d_6$ )  $\delta$  11.95 (s, 1H), 10.17 (s, 1H), 8.36 (d,  $J$  = 3.1 Hz, 1H), 7.70 (d,  $J$  = 2.5 Hz, 1H), 7.63 – 7.61 (m, 2H), 7.39 (d,  $J$  = 8.8 Hz, 1H), 7.31 (t,  $J$  = 7.9 Hz, 2H), 7.06

(t,  $J$  = 7.4 Hz, 1H), 6.86 (dd,  $J$  = 8.8, 2.6 Hz, 1H), 3.96 (s, 2H), 3.78 (s, 3H).;  $^{13}\text{C}$  NMR (100 MHz, DMSO- $d_6$ )  $\delta$  189.1, 166.3, 156.0, 139.6, 135.7, 131.9, 129.2, 126.7, 123.7, 119.5, 116.7, 113.4, 113.3, 103.4, 55.7, 49.3; IR (neat,  $\text{cm}^{-1}$ ): 3309, 3140, 1697, 1664, 1560; HRMS (ESI)  $m/z$  calcd for  $\text{C}_{18}\text{H}_{17}\text{N}_2\text{O}_3$ : 309.1234 ( $\text{M} + \text{H}$ ) $^+$ , found: 309.1228.

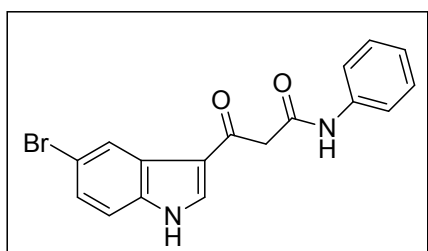

### 3-(5-Bromo-1H-indol-3-yl)-3-oxo-N-phenylpropanamide

(13c): Light brown solid, 64% yield, mp 227–228 °C;  $^1\text{H}$  NMR (400 MHz, DMSO- $d_6$ )  $\delta$  12.27 (s, 1H), 10.22 (s, 1H), 8.49 (d,  $J$  = 3.1 Hz, 1H), 8.32 (d,  $J$  = 1.9 Hz, 1H), 7.61 (d,  $J$  = 7.6 Hz, 2H), 7.49 (d,  $J$  = 8.6 Hz, 1H), 7.38 (dd,  $J$  = 8.6, 2.0 Hz, 1H), 7.32

(t,  $J$  = 7.9 Hz, 2H), 7.06 (t,  $J$  = 7.4 Hz, 1H), 3.99 (s, 2H);  $^{13}\text{C}$  NMR (100 MHz, DMSO- $d_6$ )  $\delta$  189.4, 166.1, 139.5, 136.8, 135.9, 129.2, 127.6, 126.1, 123.8, 123.8, 119.5, 116.3, 115.2, 114.9, 49.3; IR (neat,  $\text{cm}^{-1}$ ): 3395, 3294, 1670, 995; HRMS (ESI)  $m/z$  calcd for  $\text{C}_{17}\text{H}_{14}\text{BrN}_2\text{O}_2$ : 357.0233 ( $\text{M} + \text{H}$ ) $^+$ , found: 357.0196.

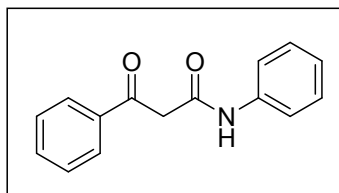

**3-Oxo-N, 3-diphenylpropanamide (13d):** Off-white solid, 82% yield, mp 102–103 °C (lit. mp 102–104 °C);<sup>9</sup>  $^1\text{H}$  NMR (400 MHz,  $\text{CDCl}_3$ )  $\delta$



9.32 (s, 1H), 8.06 (d,  $J = 7.5$  Hz, 2H), 7.66 (t,  $J = 7.4$  Hz, 1H), 7.61 (d,  $J = 7.9$  Hz, 2H), 7.54 (t,  $J = 7.7$  Hz, 2H), 7.36 (t,  $J = 7.8$  Hz, 2H), 7.15 (t,  $J = 7.4$  Hz, 1H), 4.14 (s, 2H);  $^{13}\text{C}$  NMR (100 MHz,  $\text{CDCl}_3$ )  $\delta$  196.5, 163.8, 137.6, 136.1, 134.4, 129.0, 129.0, 128.6, 124.6, 120.2, 45.6; IR (neat,  $\text{cm}^{-1}$ ): 3310, 1693, 1658, 1595, 1543, 1442.

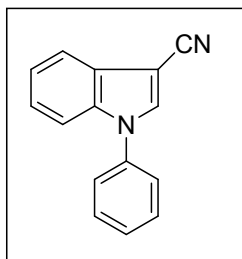

**1-Phenyl-1H-indole-3-carbonitrile (14a):** Yellowish solid, 93% yield, mp 115–116 °C (lit. mp 116 °C)<sup>10</sup>.  $^1\text{H}$  NMR (400 MHz,  $\text{CDCl}_3$ )  $\delta$  7.86 – 7.84 (m, 1H), 7.81 (s, 1H), 7.63 – 7.59 (m, 2H), 7.55 – 7.49 (m, 4H), 7.39 – 7.36 (m, 2H);  $^{13}\text{C}$  NMR (100 MHz,  $\text{CDCl}_3$ )  $\delta$  137.8, 135.6, 134.7, 130.1, 128.4, 128.0, 124.9, 124.6, 122.8, 120.0, 115.5, 111.6, 88.1; IR (neat,  $\text{cm}^{-1}$ ): 3119, 2221, 1541; HRMS (ESI)  $m/z$  calcd for  $\text{C}_{15}\text{H}_{11}\text{N}_2$ : 219.0917 ( $\text{M} + \text{H}$ )<sup>+</sup>, found: 219.0911.

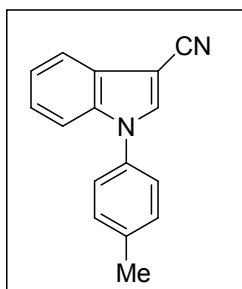

**1-(p-Tolyl)-1H-indole-3-carbonitrile (14b):** White solid, 85% yield, mp 101–102 °C;  $^1\text{H}$  NMR (400 MHz,  $\text{CDCl}_3$ )  $\delta$  7.87 – 7.83 (m, 1H), 7.79 (s, 1H), 7.53 – 7.49 (m, 1H), 7.38 – 7.35 (m, 6H), 2.49 (s, 3H);  $^{13}\text{C}$  NMR (100 MHz,  $\text{CDCl}_3$ )  $\delta$  138.5, 135.8, 135.3, 134.7, 130.5, 127.9, 124.8, 124.4, 122.7, 120.0, 115.6, 111.6, 87.8, 21.1; IR (neat,  $\text{cm}^{-1}$ ): 3113, 2920, 2222, 1535; HRMS (ESI)  $m/z$  calcd for  $\text{C}_{16}\text{H}_{13}\text{N}_2$ : 233.1073 ( $\text{M} + \text{H}$ )<sup>+</sup>, found: 233.1066.

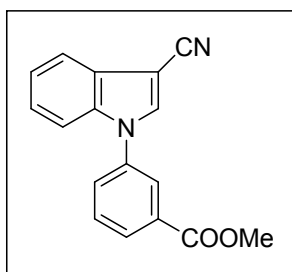

**Methyl 3-(3-cyano-1H-indol-1-yl)benzoate (14c):** Off-white solid, 79% yield, mp 170–171 °C;  $^1\text{H}$  NMR (400 MHz,  $\text{CDCl}_3$ )  $\delta$  8.18 (dd,  $J = 6.8, 1.8$  Hz, 2H), 7.87 (d,  $J = 2.6$  Hz, 1H), 7.85 (s, 1H), 7.74 – 7.66 (m, 2H), 7.54 – 7.52 (m, 1H), 7.41 – 7.37 (m, 2H), 3.99 (s, 3H);  $^{13}\text{C}$  NMR (100 MHz,  $\text{CDCl}_3$ )  $\delta$  165.7, 138.1, 135.5, 134.4, 132.4, 130.2, 129.3, 129.0, 128.0, 125.8, 124.9, 123.1, 120.2, 115.2, 111.3, 88.9, 52.6; IR (neat,  $\text{cm}^{-1}$ ): 3120, 2958, 2222, 1539; HRMS (ESI)  $m/z$  calcd for  $\text{C}_{17}\text{H}_{13}\text{N}_2\text{O}_2$ : 277.0972 ( $\text{M} + \text{H}$ )<sup>+</sup>, found: 277.0966.

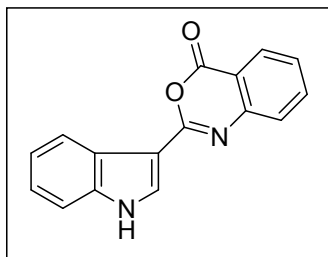

**2-(1H-Indol-3-yl)-4H-benzo[d][1,3]oxazin-4-one (15):** Pale yellow solid, 63% yield, mp 236–237 °C (lit. mp 235–236 °C)<sup>11</sup>.  $^1\text{H}$  NMR (400 MHz,  $\text{DMSO}-d_6$ )  $\delta$  12.14 (s, 1H), 8.44 (dd,  $J = 6.1, 3.1$  Hz, 1H), 8.31 (d,  $J = 3.0$  Hz, 1H), 8.13 (d,  $J = 1.2$  Hz, 1H), 7.93 – 7.89 (m, 1H), 7.69 (d,  $J$

= 7.7 Hz, 1H), 7.56 – 7.50 (m, 2H), 7.31 – 7.27 (m, 2H);  $^{13}\text{C}$  NMR (100 MHz,  $\text{DMSO-}d_6$ )  $\delta$  159.8, 156.1, 148.1, 137.4, 137.2, 132.1, 128.5, 127.4, 126.7, 125.4, 123.4, 122.0, 121.7, 116.7, 113.0, 106.9; IR (neat,  $\text{cm}^{-1}$ ) 3414, 1746, 1539; HRMS (ESI)  $m/z$  calcd for  $\text{C}_{16}\text{H}_{11}\text{N}_2\text{O}_2$ : 263.0815 ( $\text{M} + \text{H}$ ) $^+$ , found: 263.0806.

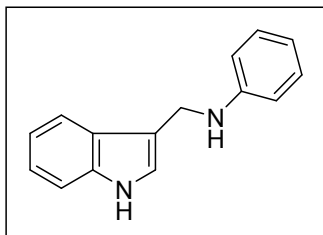

***N*-((1*H*-Indol-3-yl)methyl)aniline<sup>12</sup> (16):** Brown liquid, 42% yield;  $^1\text{H}$  NMR (400 MHz,  $\text{CDCl}_3$ )  $\delta$  8.08 (s, 1H), 7.71 (d,  $J = 7.9$  Hz, 1H), 7.42 (d,  $J = 8.2$  Hz, 1H), 7.27 – 7.16 (m, 5H), 6.79 – 6.73 (m, 3H), 4.52 (s, 2H);  $^{13}\text{C}$  NMR (100 MHz,  $\text{CDCl}_3$ )  $\delta$  148.6, 136.4, 129.3, 126.7, 122.7, 122.4, 119.8, 119.0, 117.4, 114.0, 112.9, 111.3, 40.1; IR (neat,  $\text{cm}^{-1}$ )

2943, 1519, 1022.

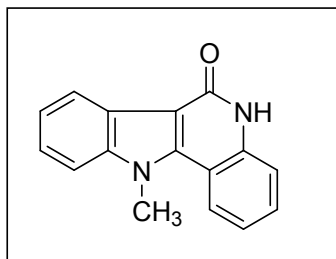

**11-Methyl-5,11-dihydro-6*H*-indolo[3,2-*c*]quinolin-6-one (17):** Pale yellow solid, 72% yield, mp 312–313 °C (lit. mp 310-315 °C)<sup>13</sup>.  $^1\text{H}$  NMR (400 MHz,  $\text{DMSO-}d_6$ )  $\delta$  11.54 (s, 1H), 8.49 (d,  $J = 8.2$  Hz, 1H), 8.32 (d,  $J = 7.7$  Hz, 1H), 7.81 (d,  $J = 8.4$  Hz, 1H), 7.55 – 7.54 (m, 2H), 7.47 – 7.43 (m, 1H), 7.34 – 7.30 (m, 2H), 4.34 (s, 3H);  $^{13}\text{C}$  NMR (100

MHz,  $\text{DMSO-}d_6$ )  $\delta$  159.9, 140.4, 139.8, 138.9, 129.3, 124.5, 123.8, 123.6, 121.9, 121.8, 121.3, 116.9, 113.0, 110.7, 107.4, 33.8; IR (neat,  $\text{cm}^{-1}$ ): 3394, 1655, 1022, 825, 763.

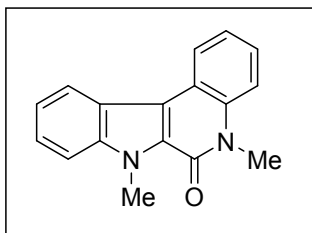

**5,7-Dimethyl-5,7-dihydro-6*H*-indolo[2,3-*c*]quinolin-6-one (18):** Off-white solid, 65% yield, mp 231–232 °C (lit. mp 234 °C)<sup>14</sup>.  $^1\text{H}$  NMR (400 MHz,  $\text{DMSO-}d_6$ )  $\delta$  8.56 (d,  $J = 7.3$  Hz, 2H), 7.77 (d,  $J = 8.4$  Hz, 1H), 7.66 (d,  $J = 8.5$  Hz, 1H), 7.60 – 7.52 (m, 2H), 7.45 – 7.37 (m, 2H), 4.34 (s, 3H), 3.80 (s, 3H);  $^{13}\text{C}$  NMR (100 MHz,  $\text{DMSO-}d_6$ )  $\delta$

156.4, 140.7, 136.3, 127.0, 126.5, 126.1, 123.9, 123.1, 123.1, 121.7, 121.4, 119.1, 118.0, 116.0, 111.7, 31.9, 29.6; IR (neat,  $\text{cm}^{-1}$ ): 3051, 1640, 1273, 728.

#### 4. Copies of $^1\text{H}$ & $^{13}\text{C}$ NMR spectra

$^1\text{H}$  NMR spectrum of 11a

Sep03-2019  
DK-MM-IN-30

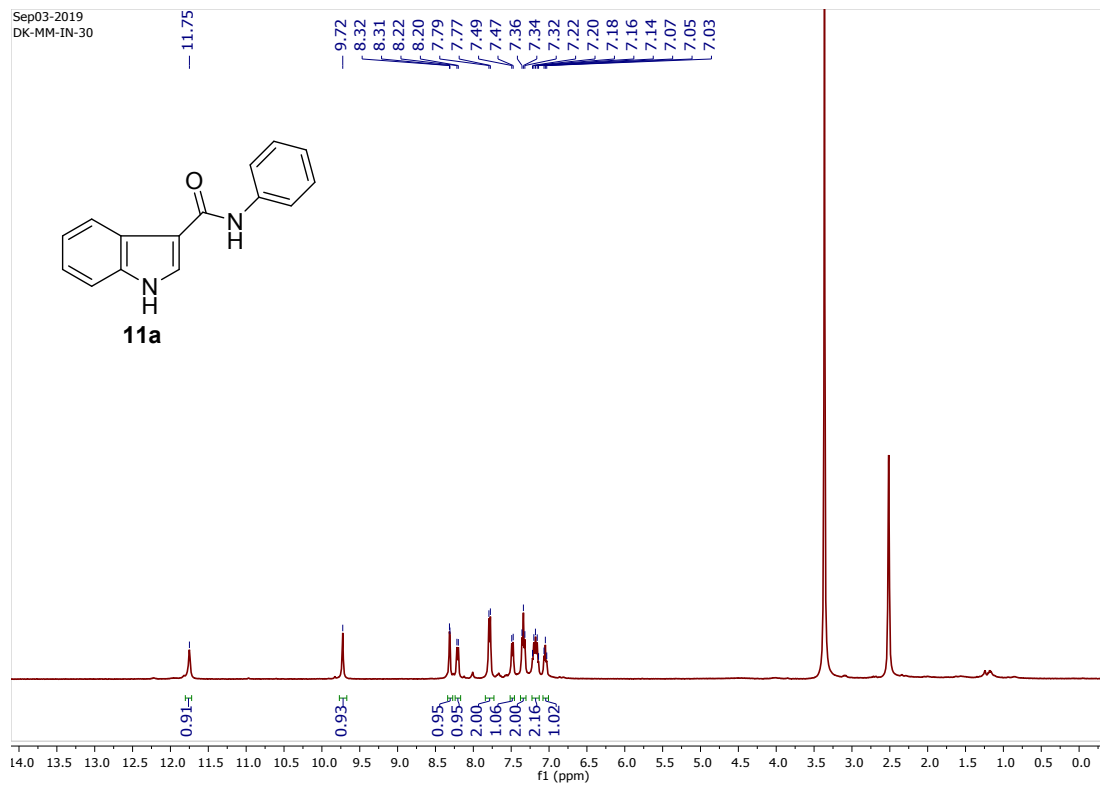

**<sup>13</sup>C NMR spectrum of 11a**

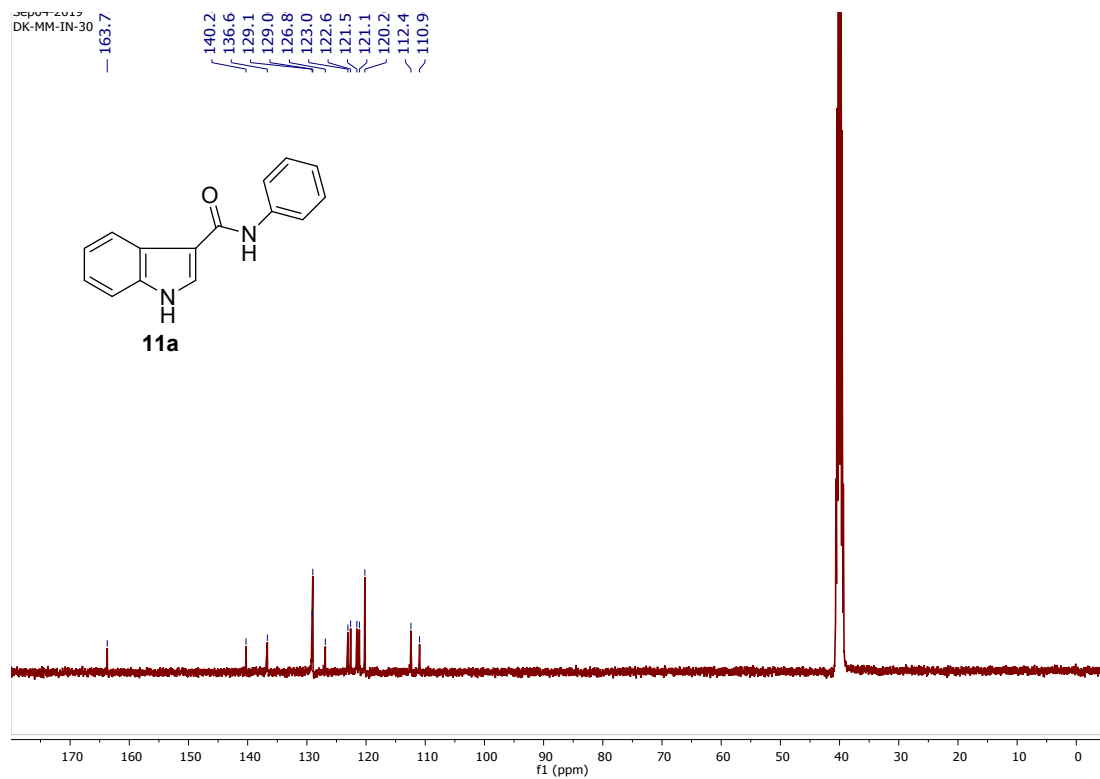

**<sup>1</sup>H NMR spectrum of 11b**

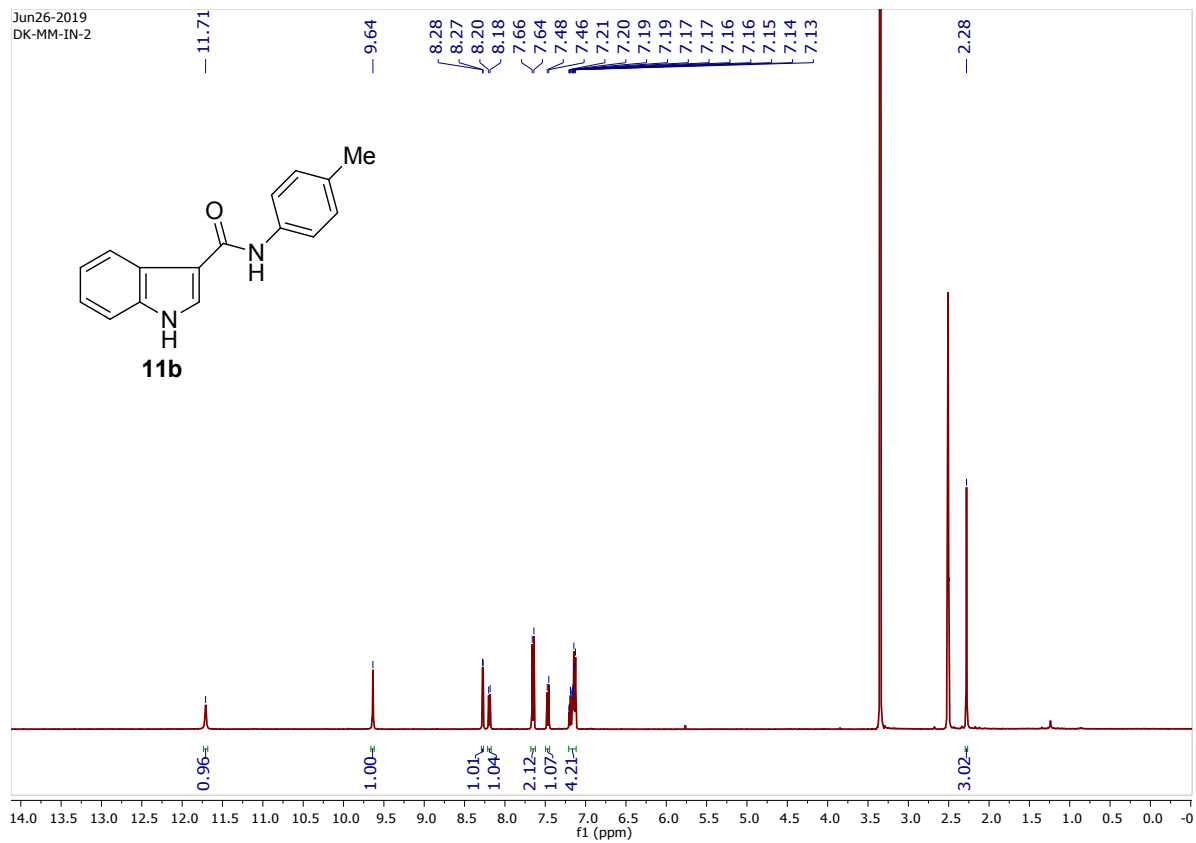

**<sup>13</sup>C NMR spectrum of 11b**

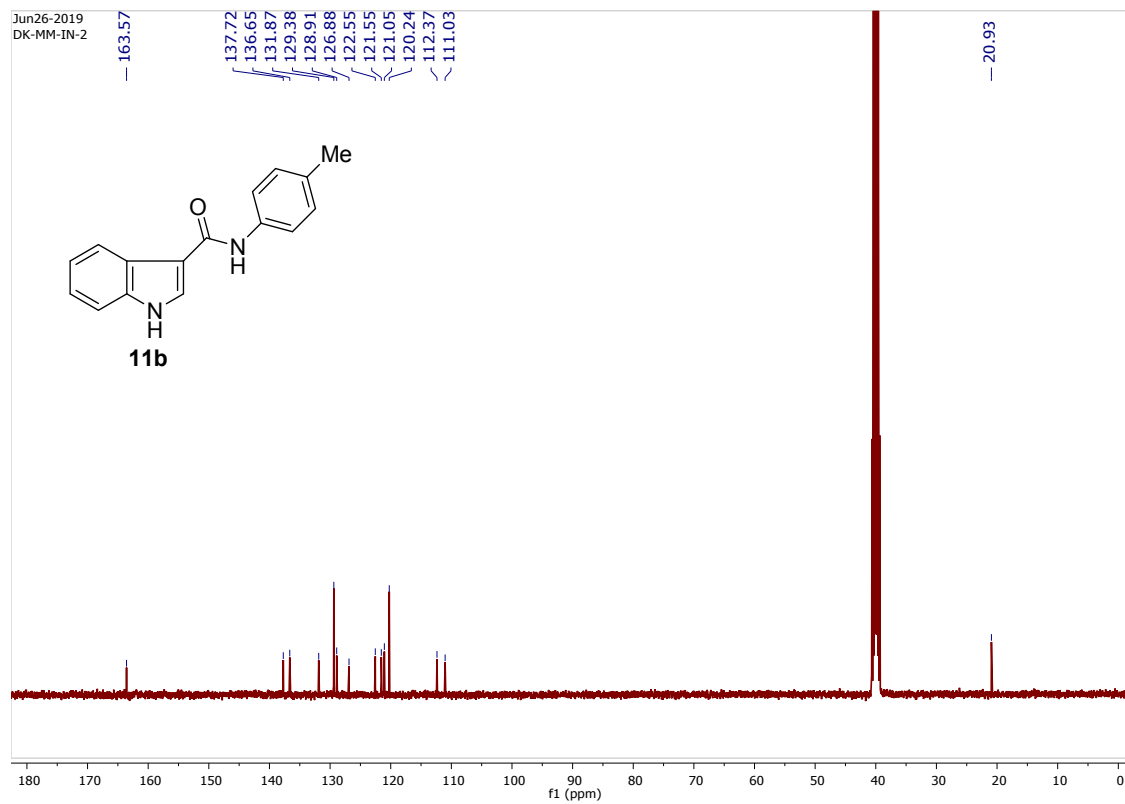

**<sup>1</sup>H NMR spectrum of 11c**

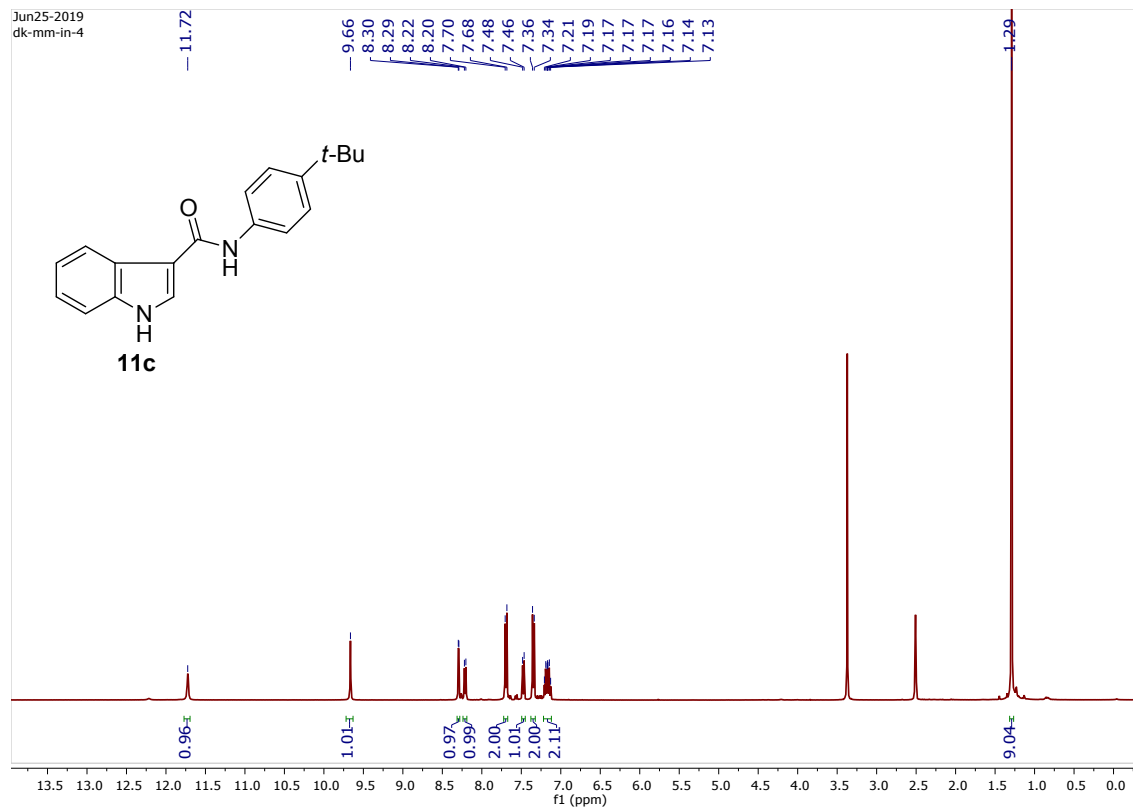

**<sup>13</sup>C NMR spectrum of 11c**

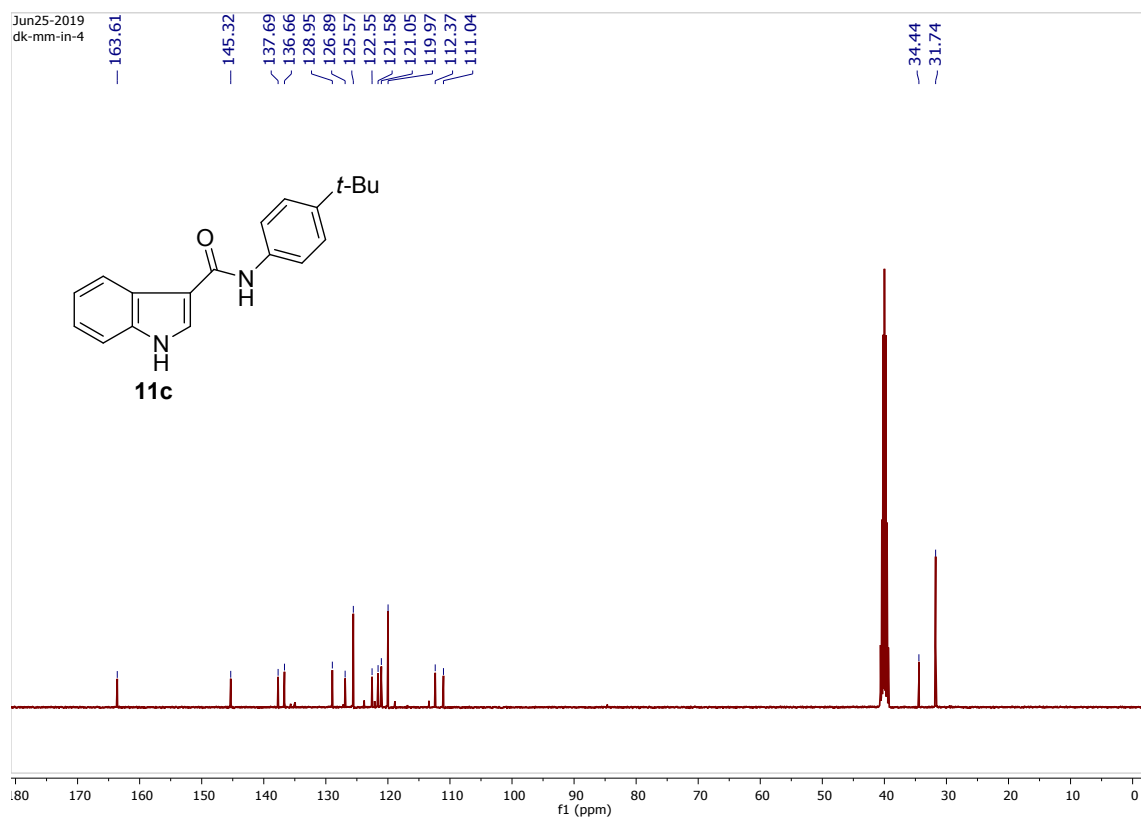

**HRMS Spectrum of 11c**

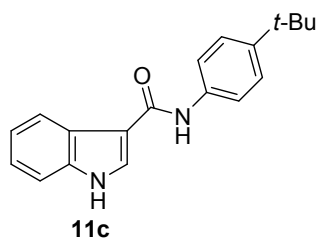

MS Zoomed Spectrum

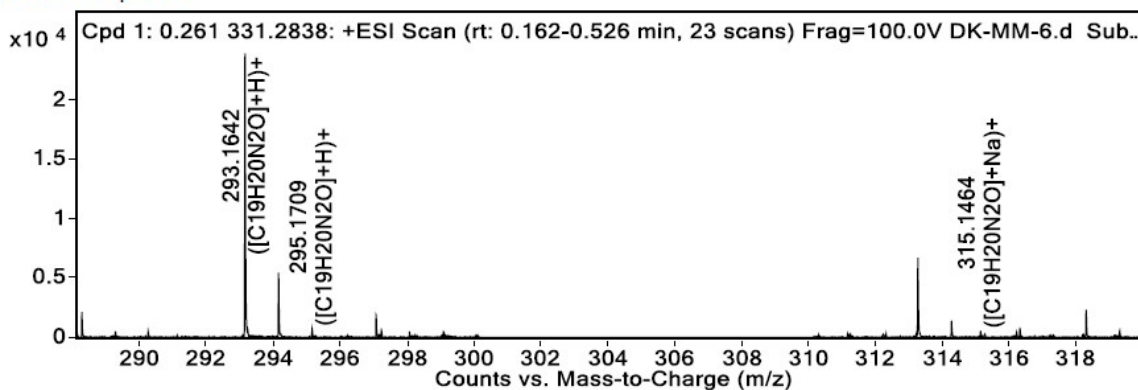

<sup>1</sup>H NMR spectrum of 11d

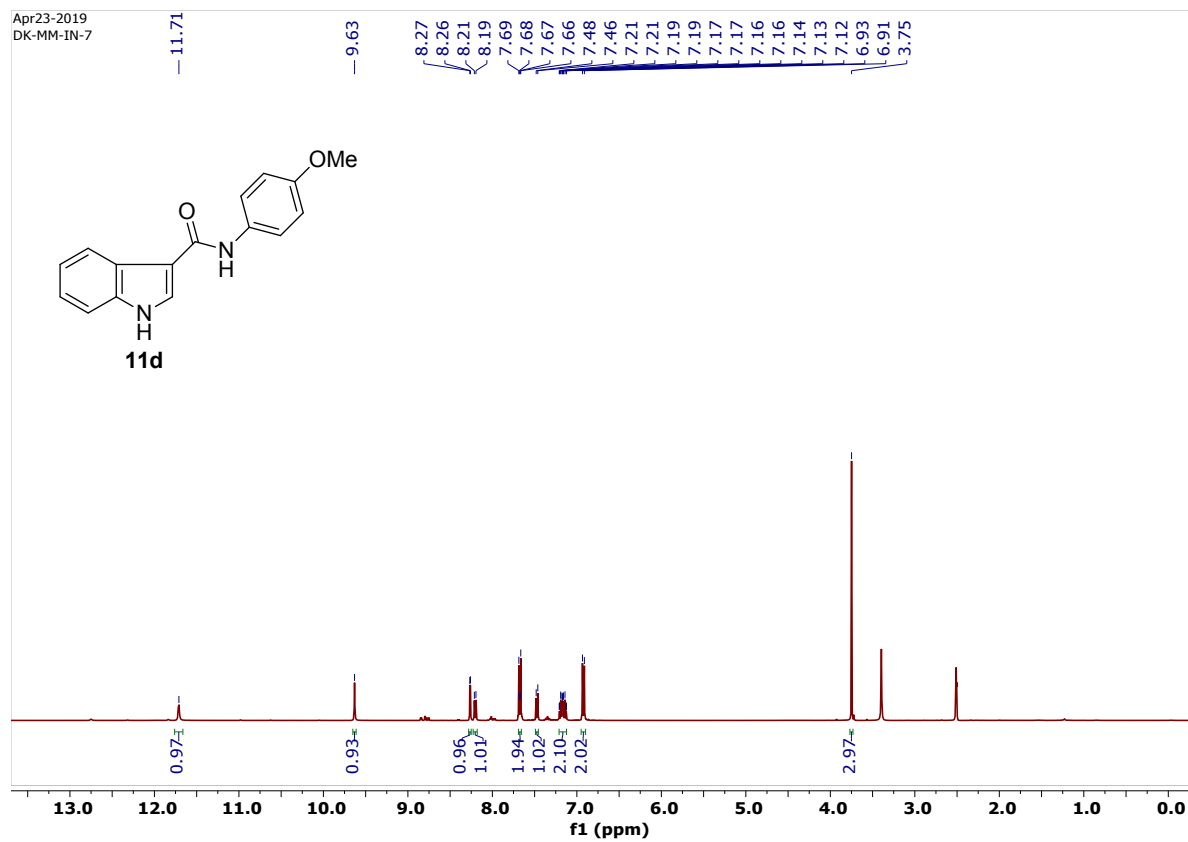

### <sup>13</sup>C NMR spectrum of 11d

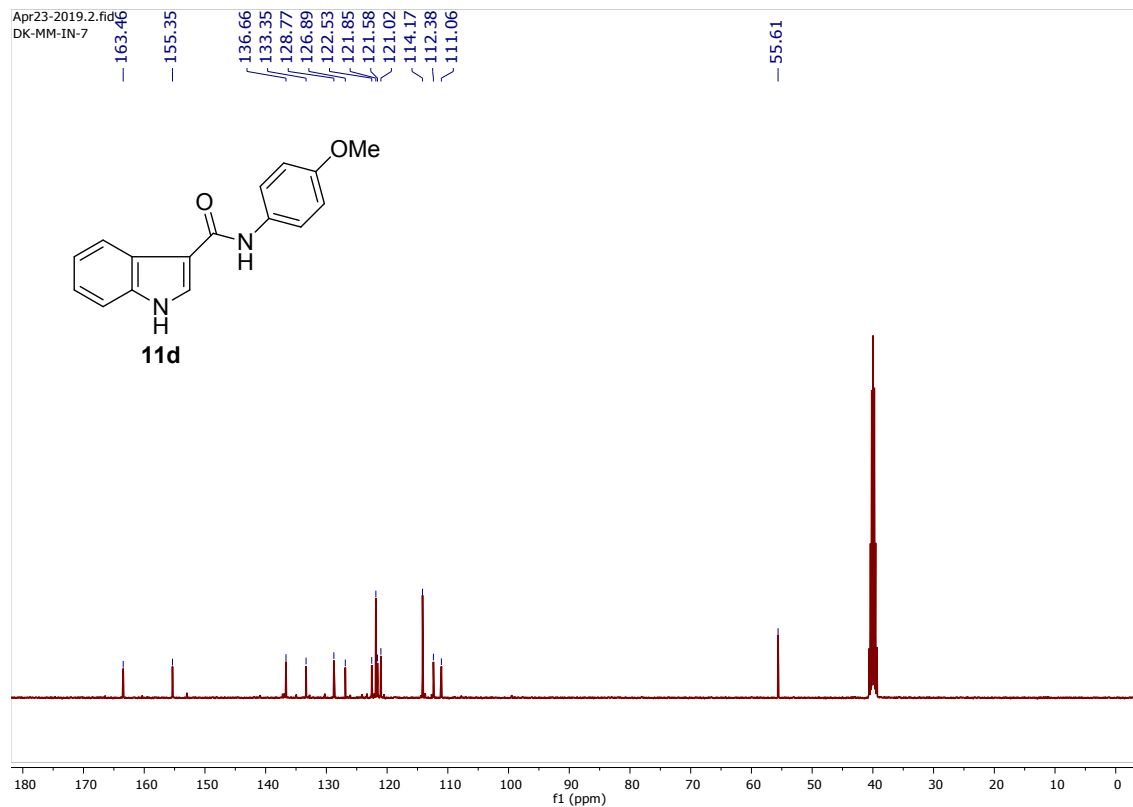

### <sup>1</sup>H NMR spectrum of 11e

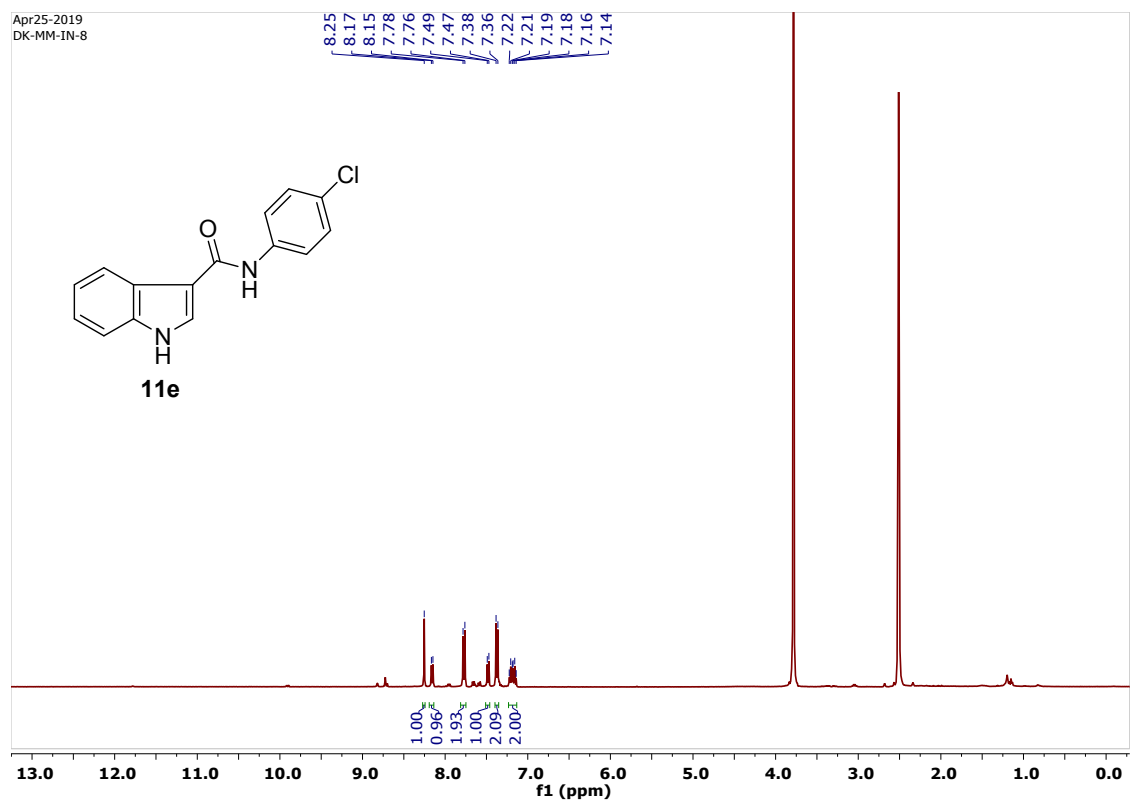

### <sup>13</sup>C NMR spectrum of 11e

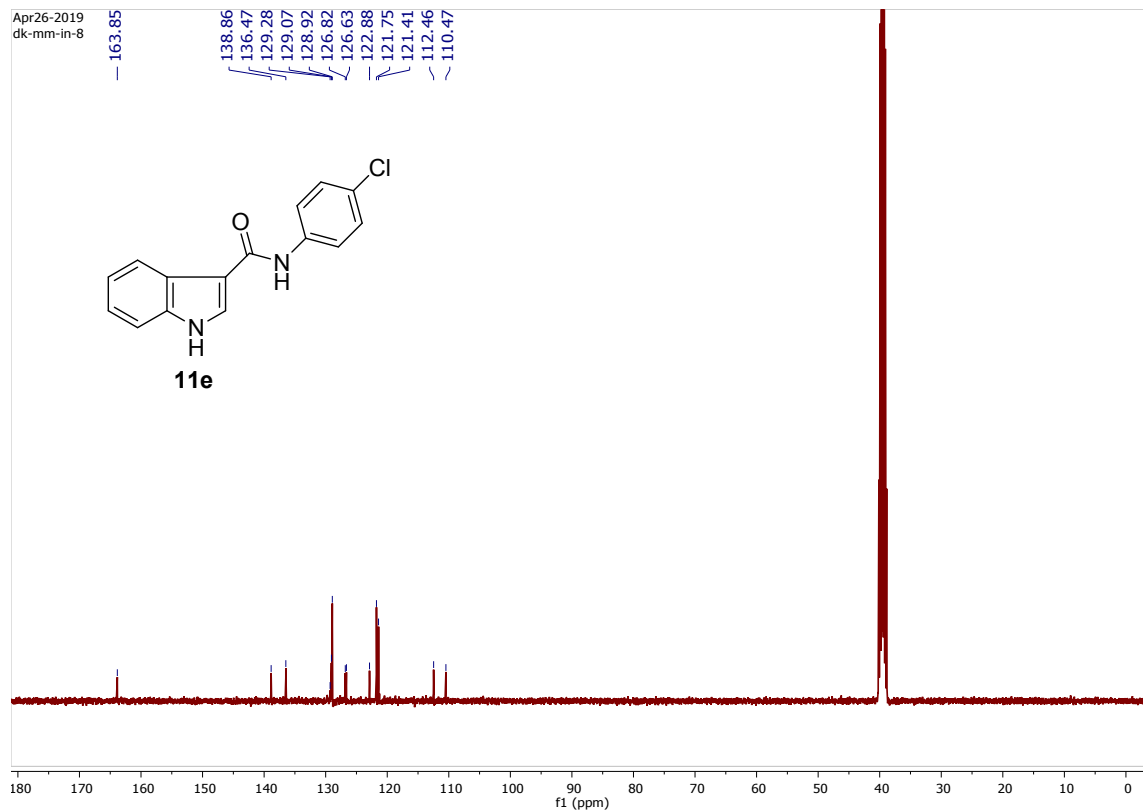

### <sup>1</sup>H NMR spectrum of 11f

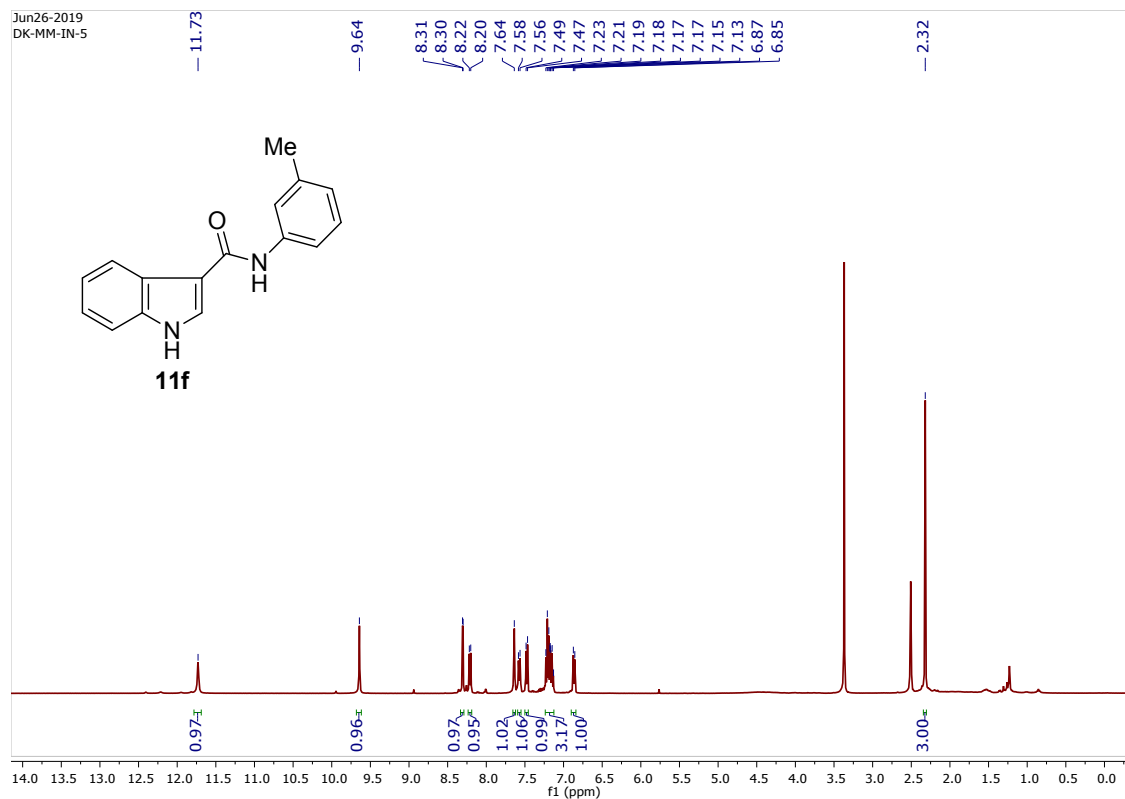



### <sup>13</sup>C NMR spectrum of 11f

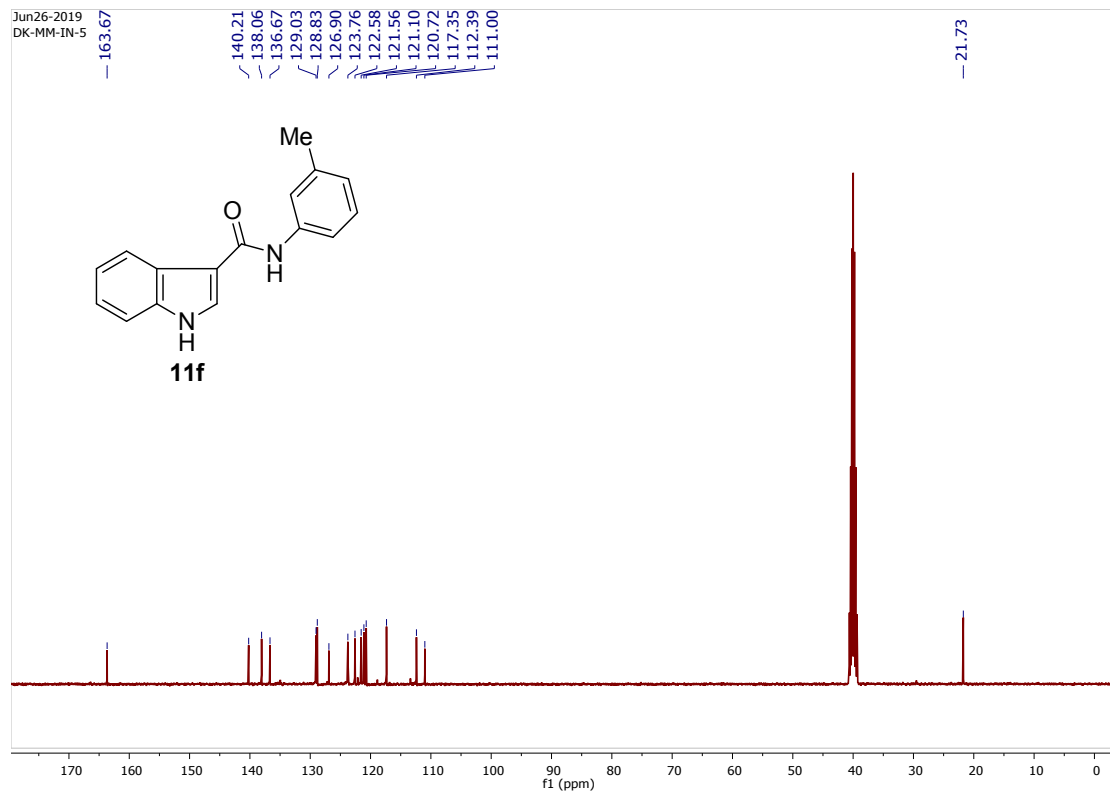

### HRMS Spectrum of 11f

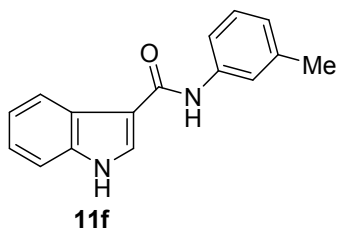

#### MS Zoomed Spectrum

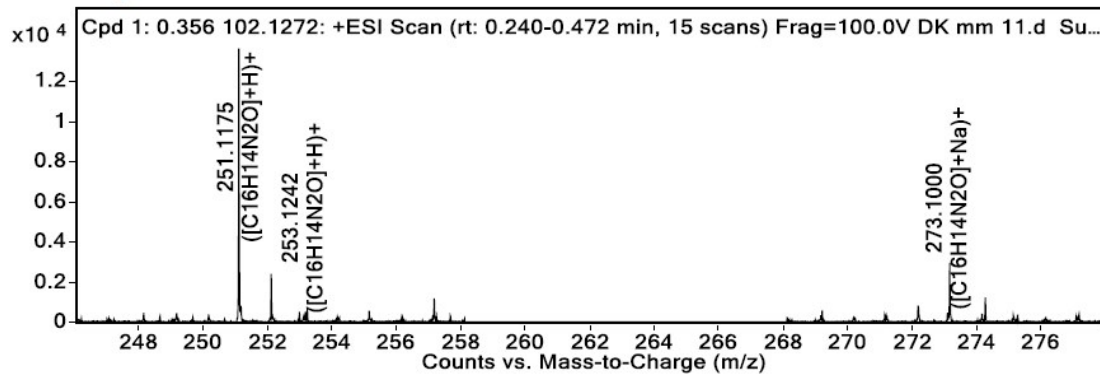

### <sup>1</sup>H NMR spectrum of 11g

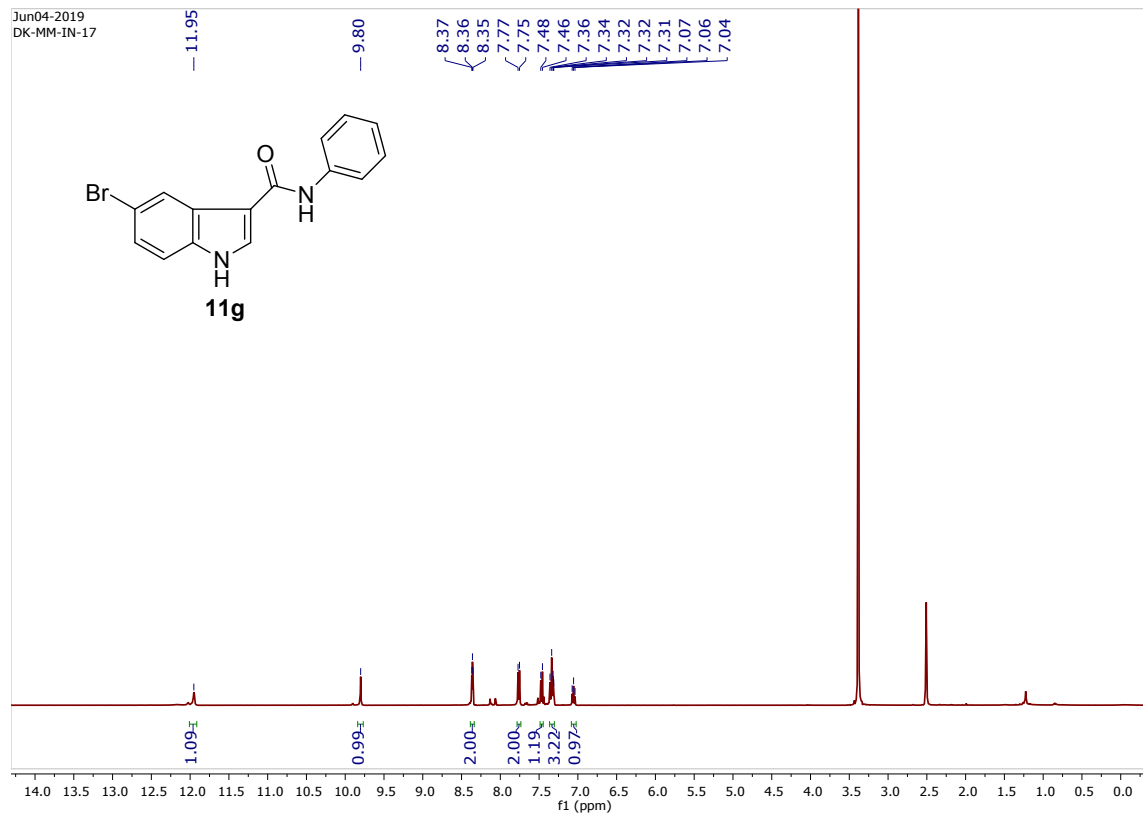

### <sup>13</sup>C NMR spectrum of 11g

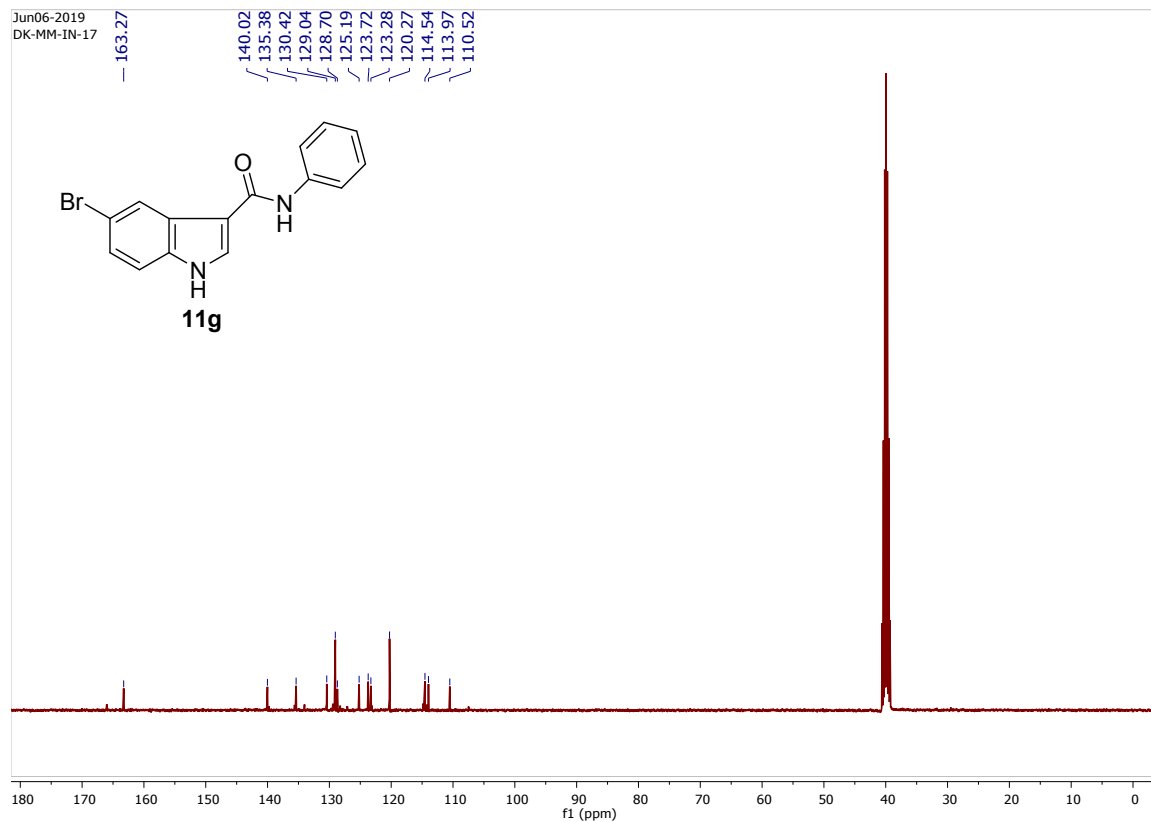

## HRMS Spectrum of 11g

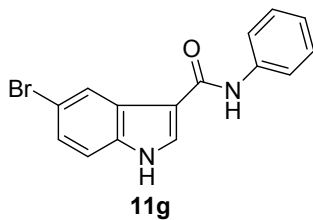

### MS Zoomed Spectrum

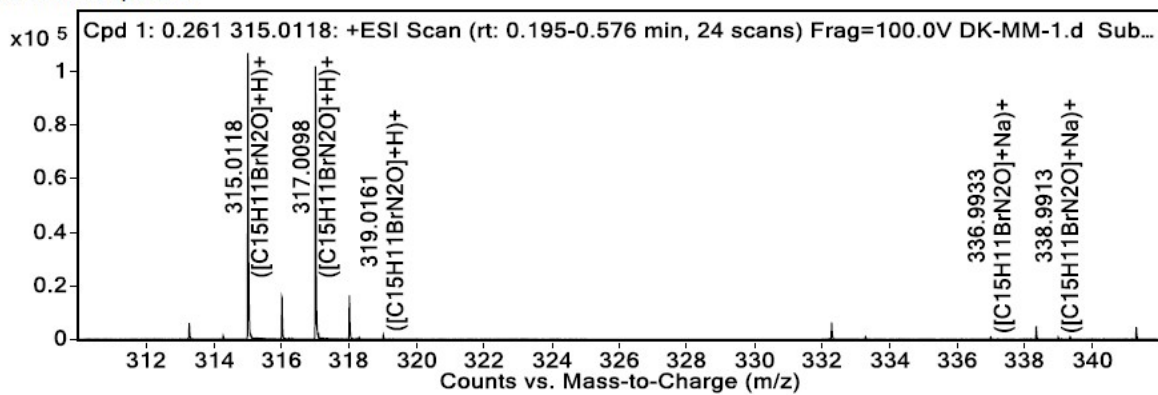

## $^1H$ NMR spectrum of 11h

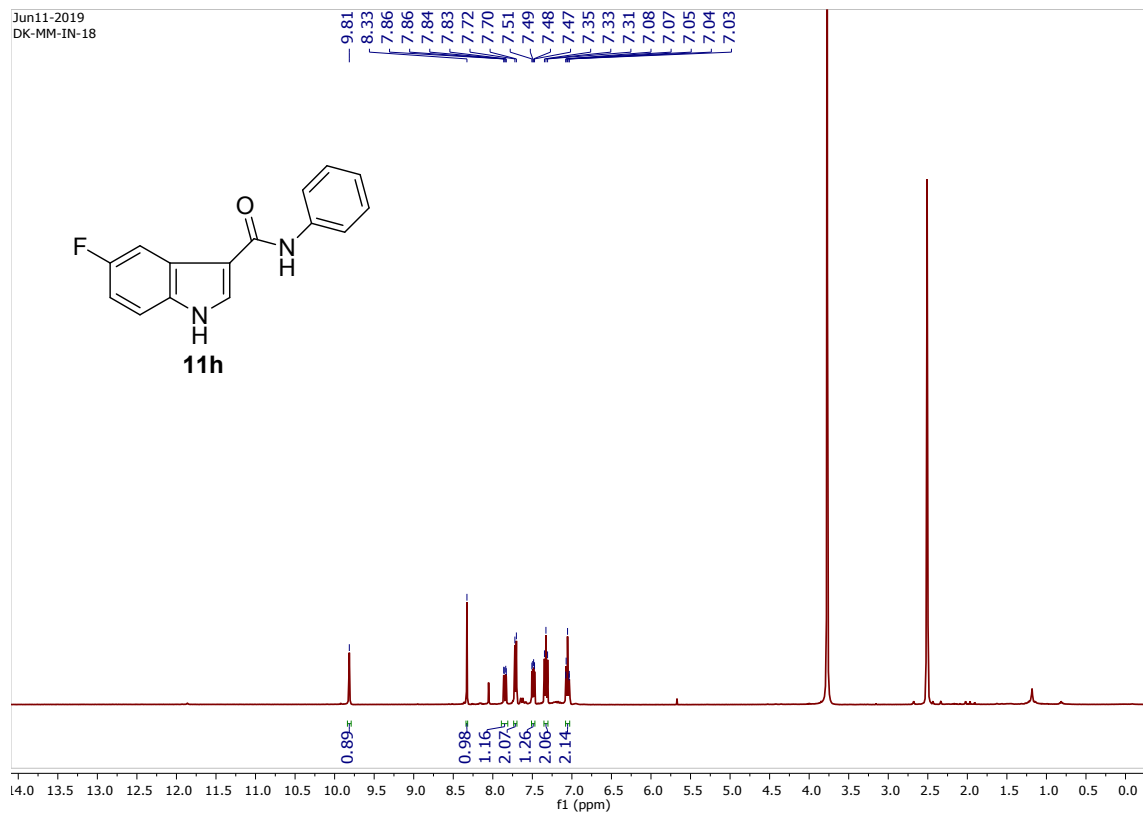

### <sup>13</sup>C NMR spectrum of 11h

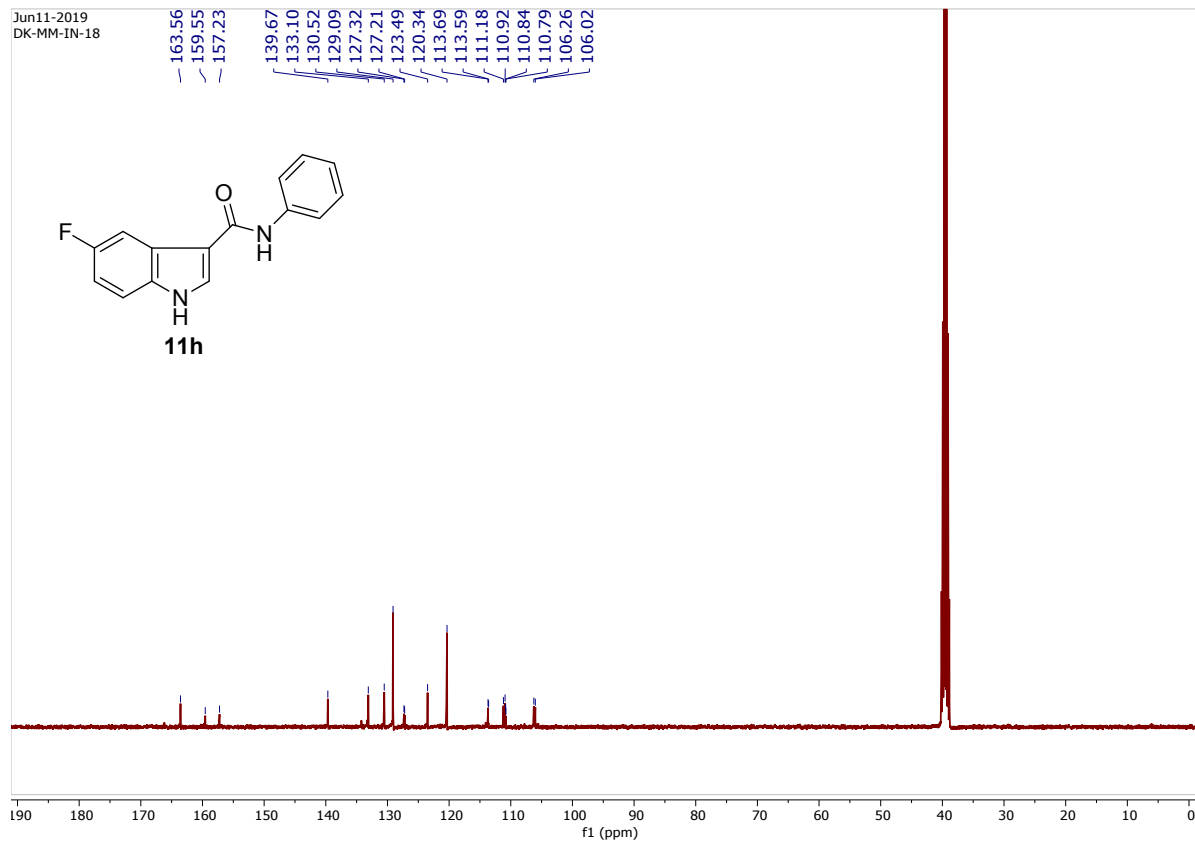

### HRMS Spectrum of 11h

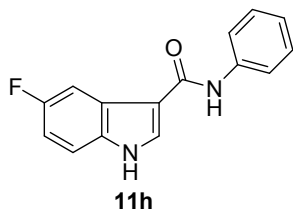

### MS Zoomed Spectrum

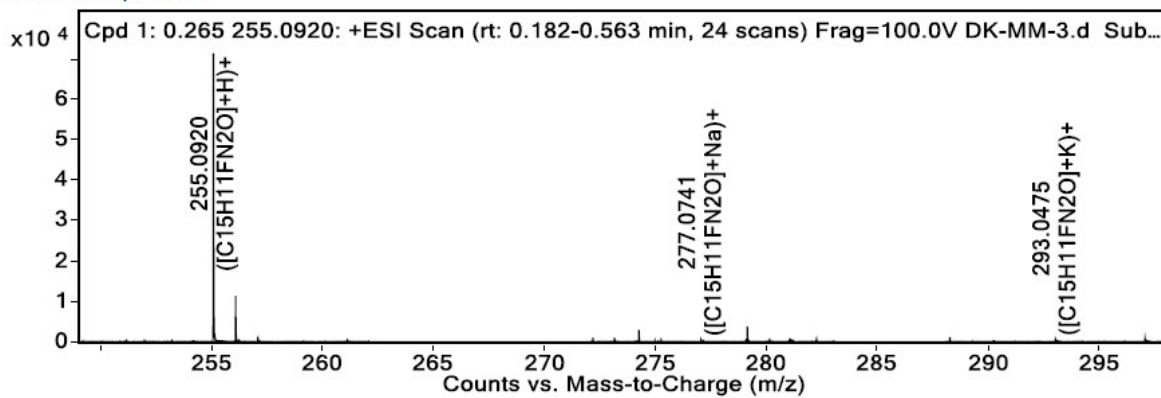

### <sup>1</sup>H NMR spectrum of 11i

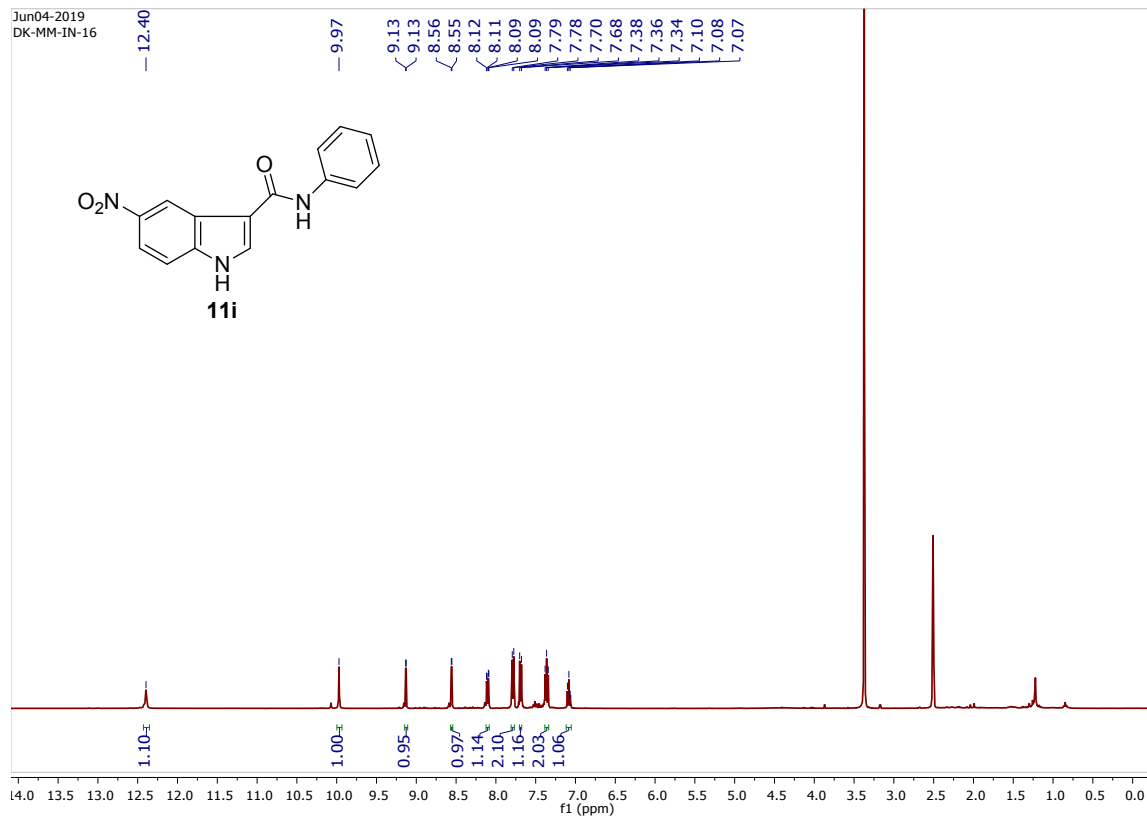

### <sup>13</sup>C NMR spectrum of 11i

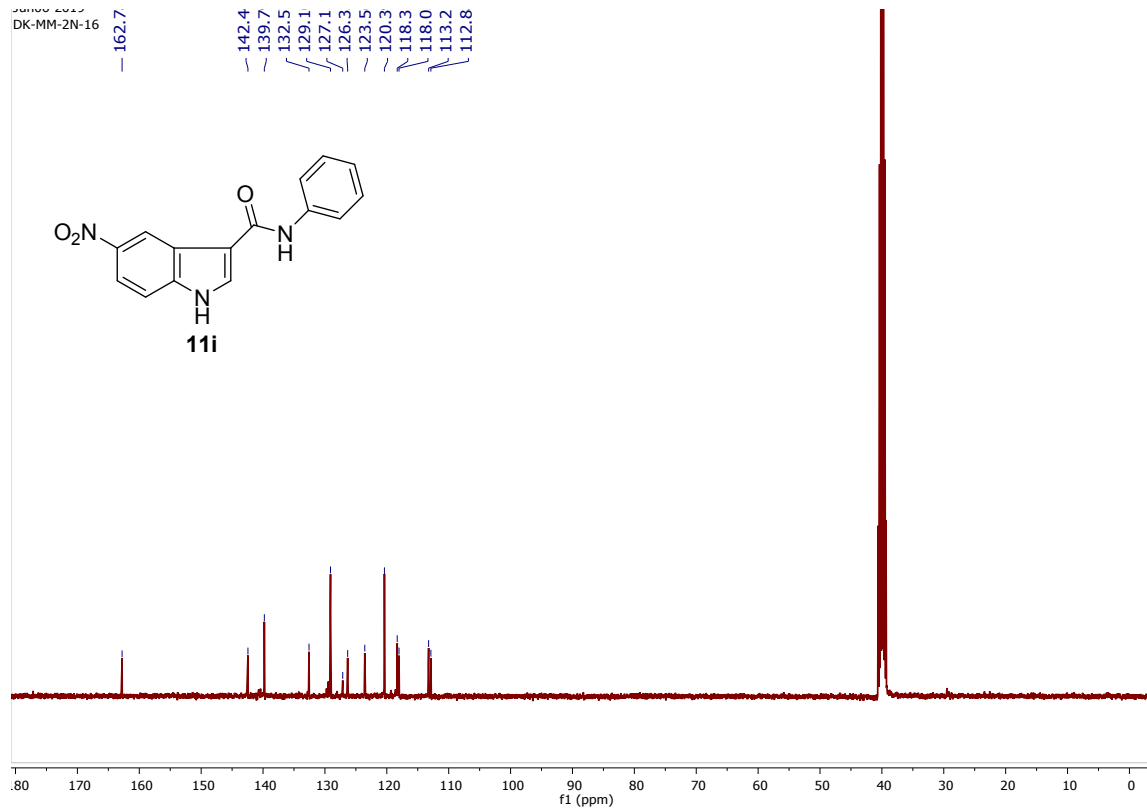

## HRMS Spectrum of 11i

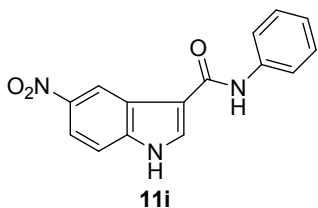

MS Zoomed Spectrum

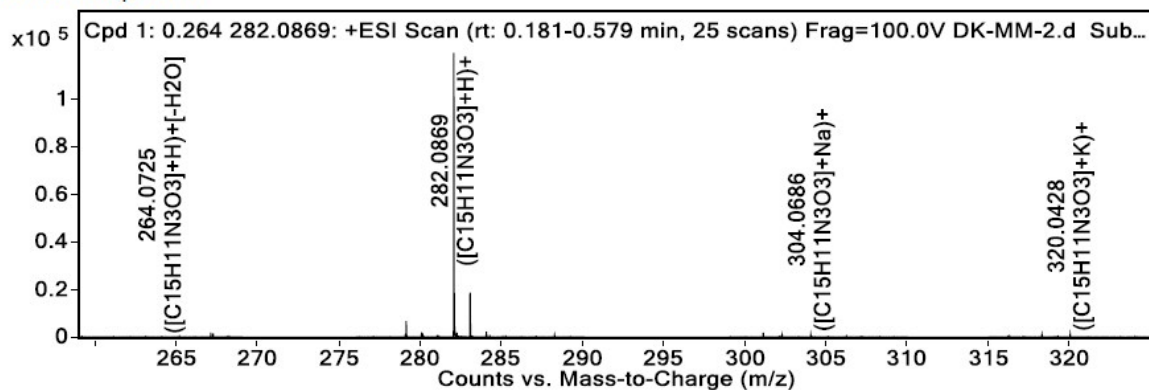

## <sup>1</sup>H NMR spectrum of 11j

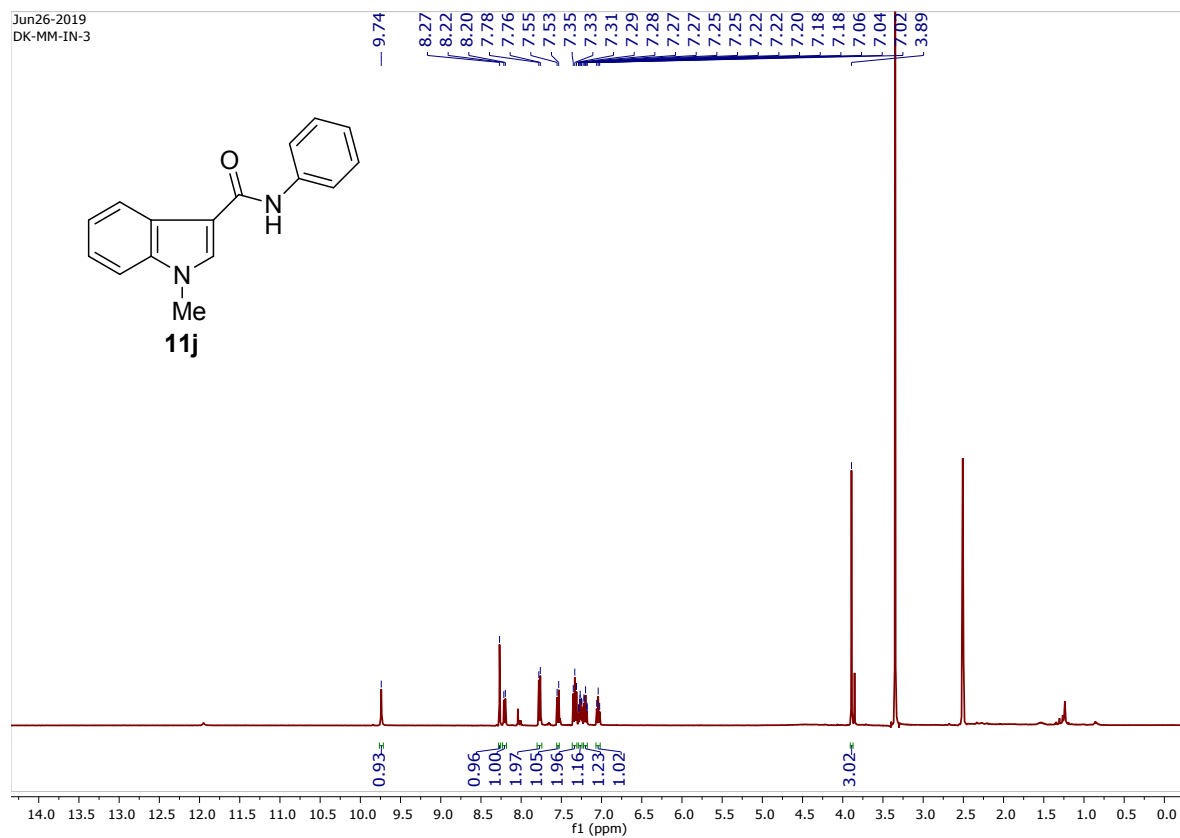

### <sup>13</sup>C NMR spectrum of 11j

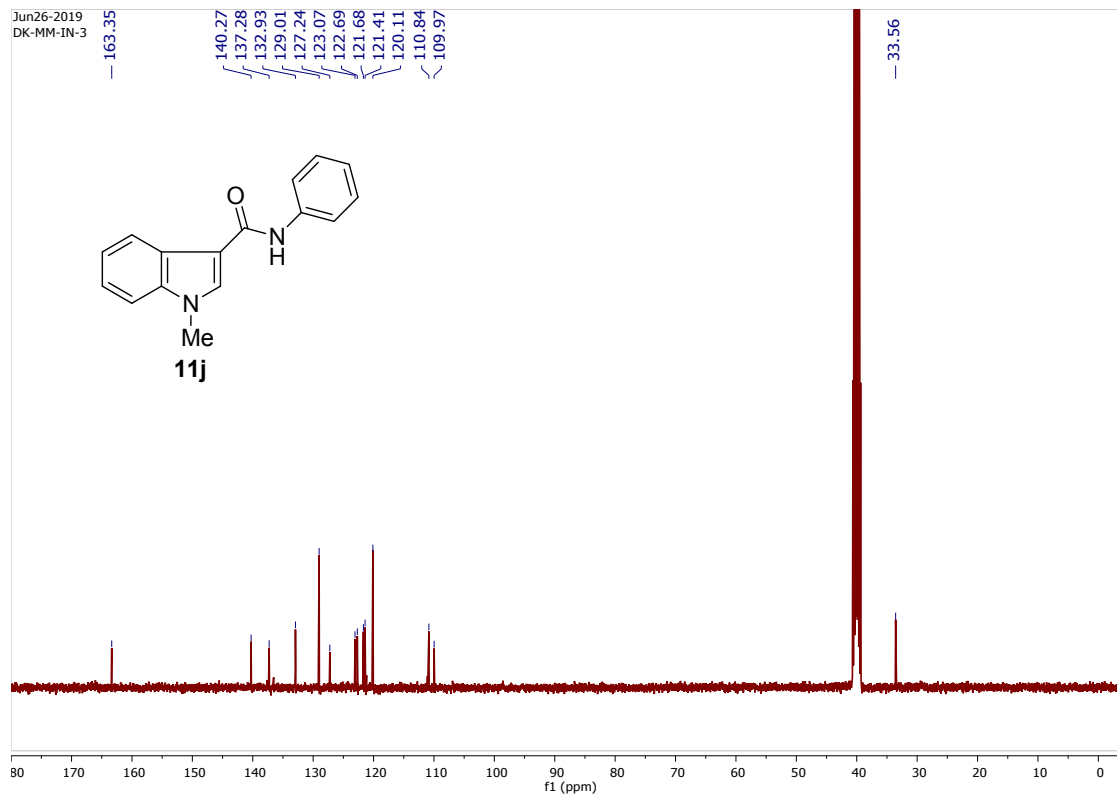

### <sup>1</sup>H NMR spectrum of 11k

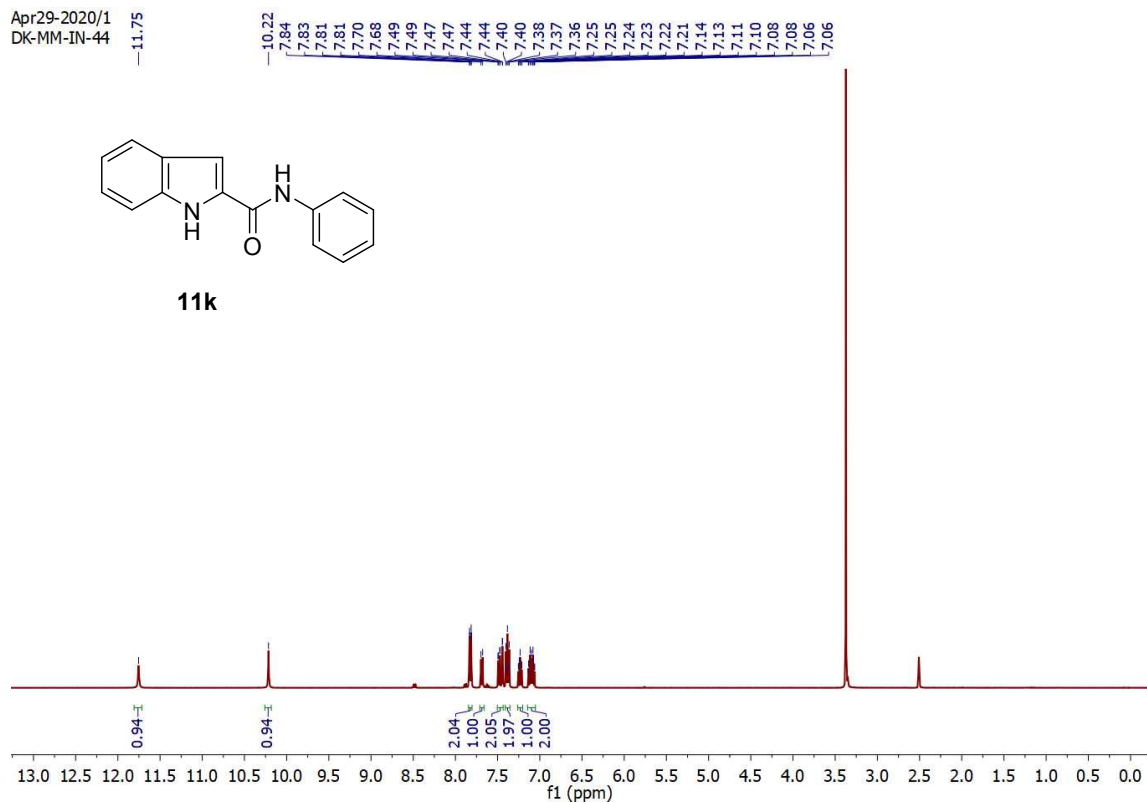

### <sup>13</sup>C NMR spectrum of 11k

Apr30-2020/1  
DK-MM-IN-44

160.20  
139.41  
137.29  
131.95  
129.16  
127.50  
124.24  
124.00  
122.20  
120.61  
120.38  
112.86  
104.34

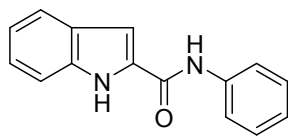

11k

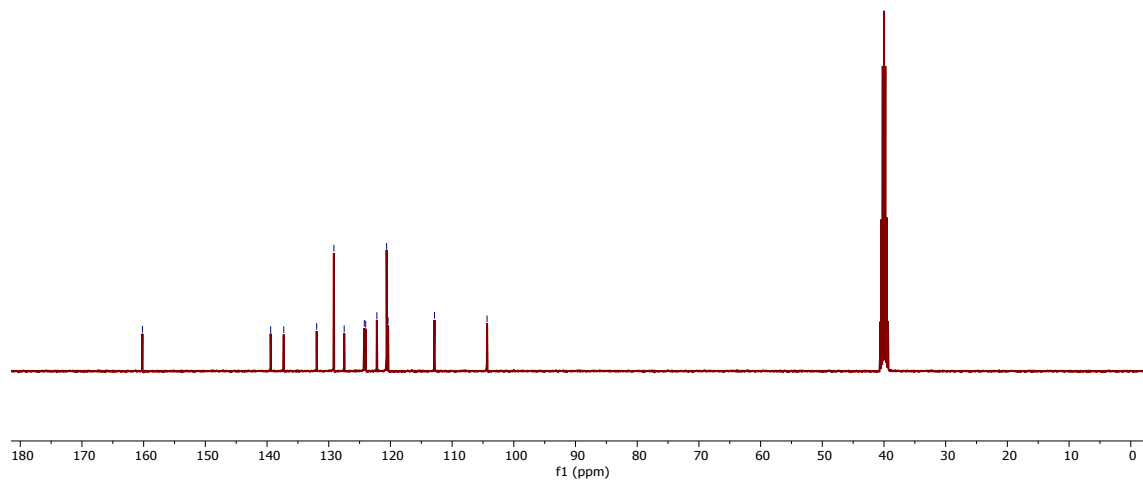

### <sup>1</sup>H NMR spectrum of 13a



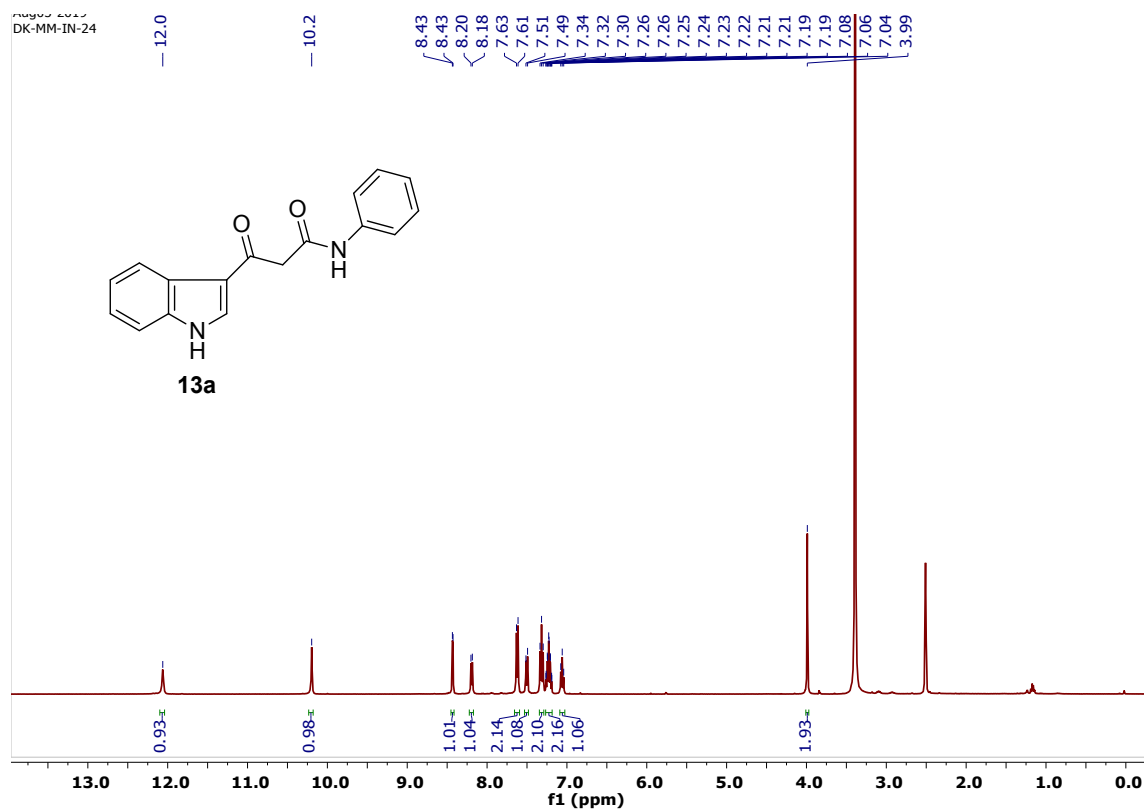

**<sup>13</sup>C NMR spectrum of 13a**

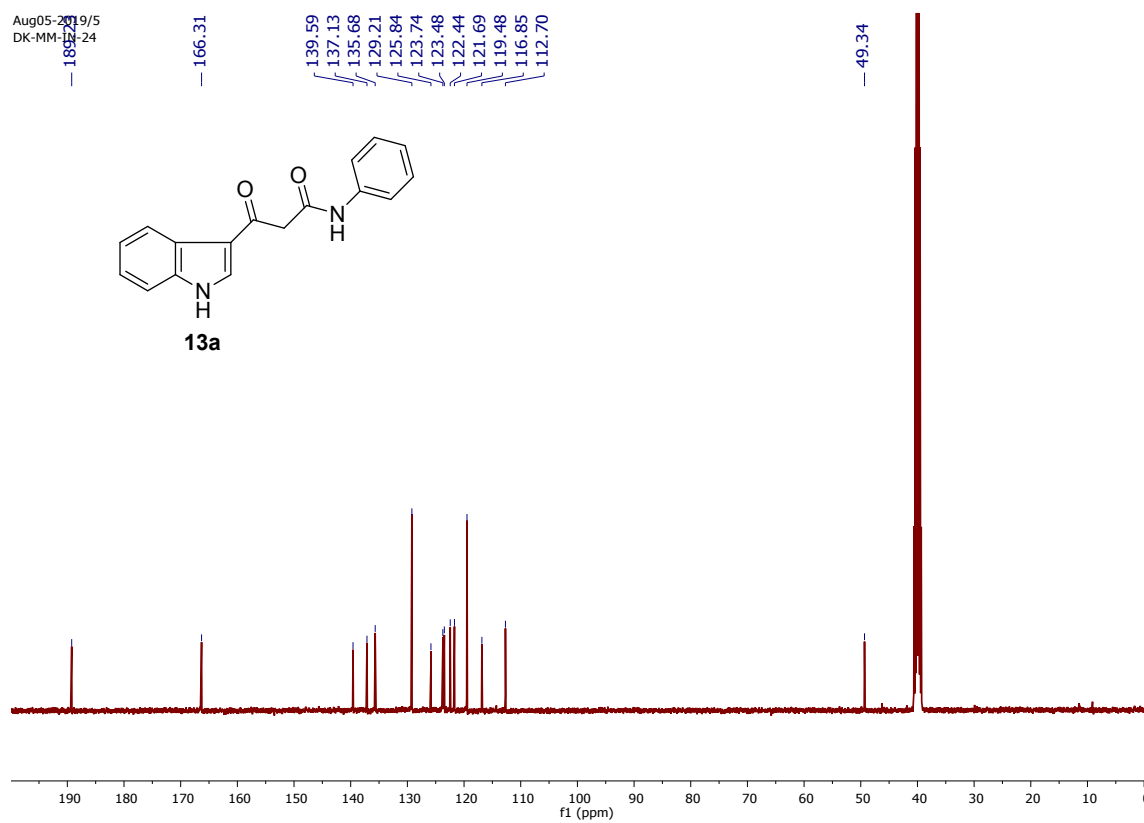

**HRMS Spectrum of 13a**

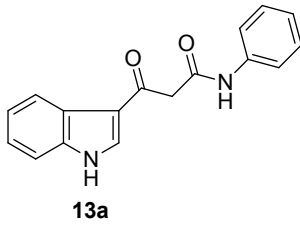

MS Zoomed Spectrum

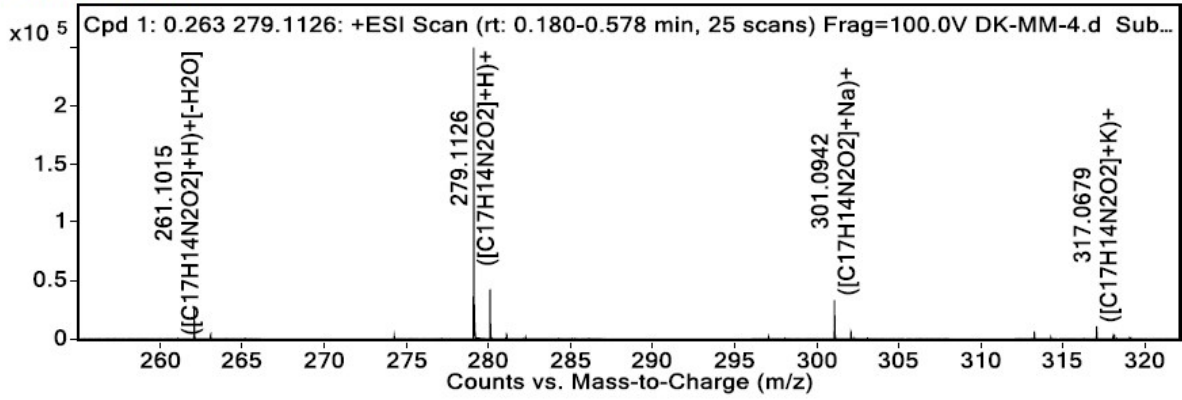

<sup>1</sup>H NMR spectrum of 13b

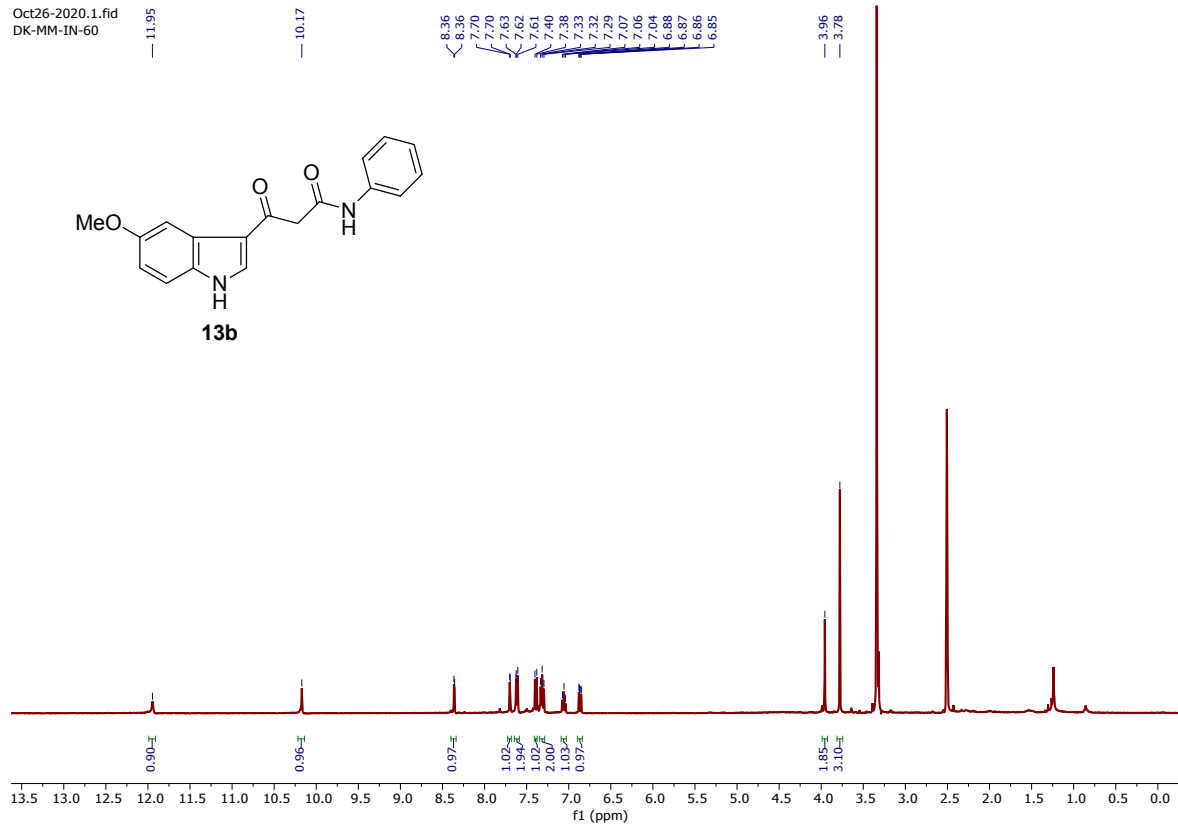

### <sup>13</sup>C NMR spectrum of 13b

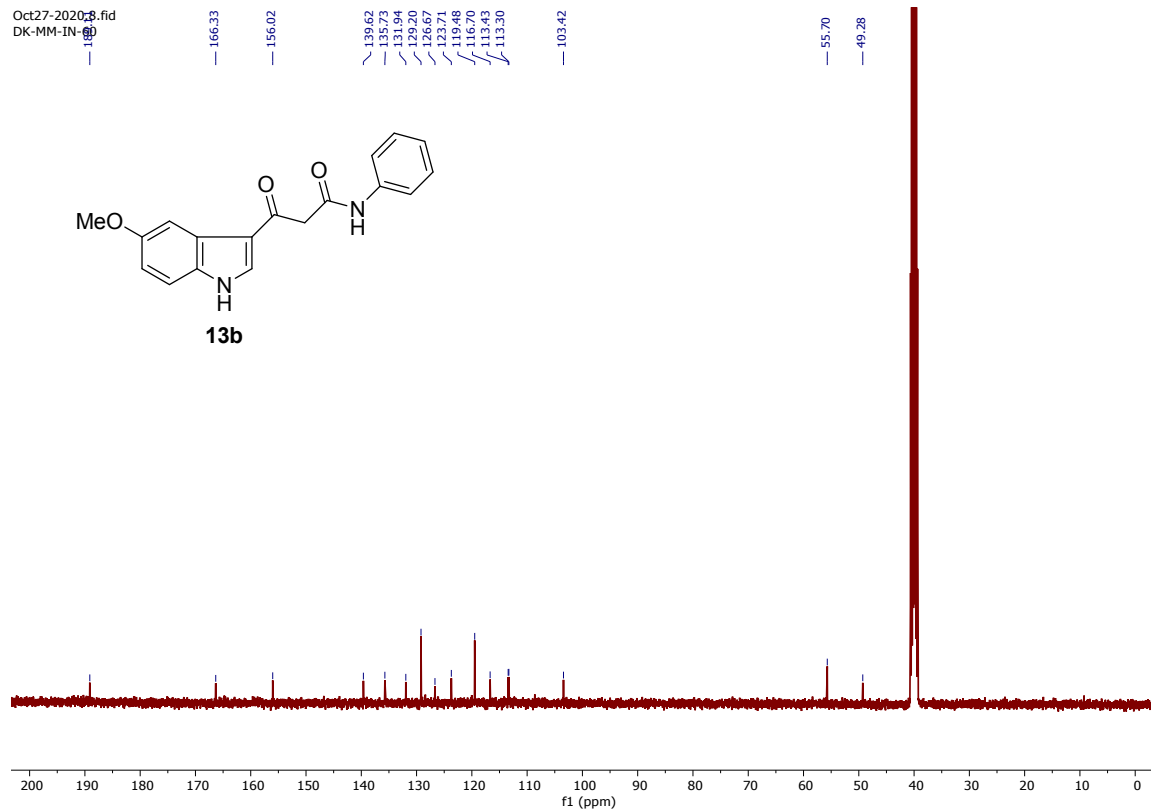

### HRMS Spectrum of 13b

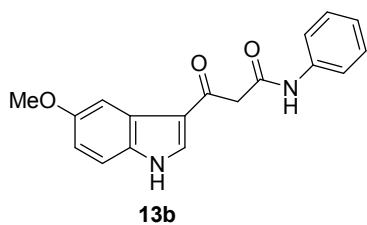

#### MS Zoomed Spectrum

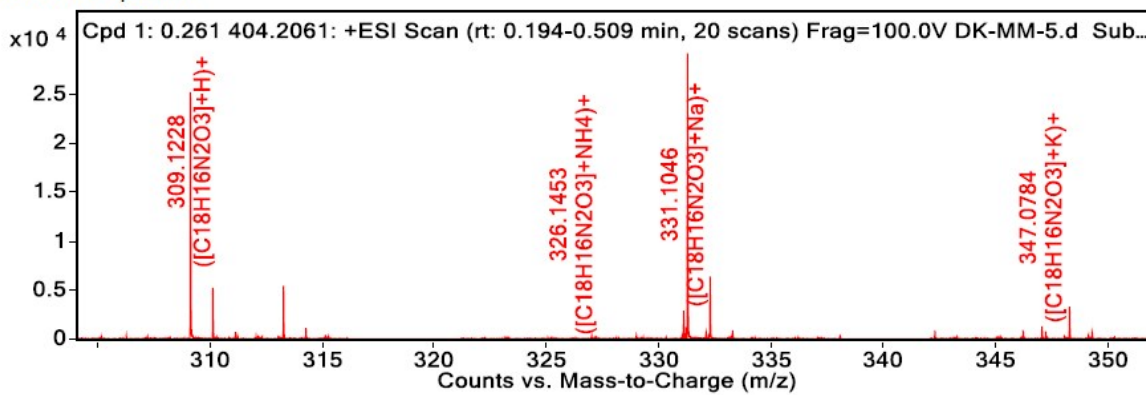

### <sup>1</sup>H NMR spectrum of 13c

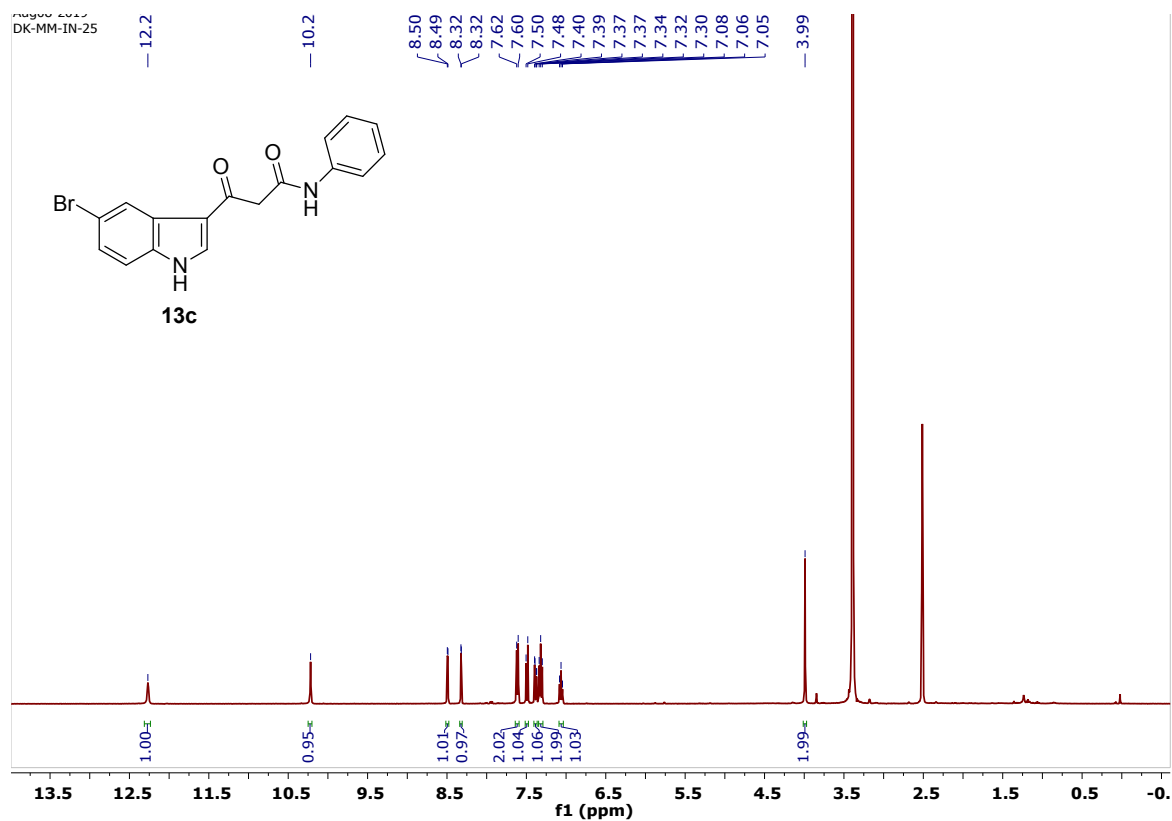

**<sup>13</sup>C NMR spectrum of 13c**

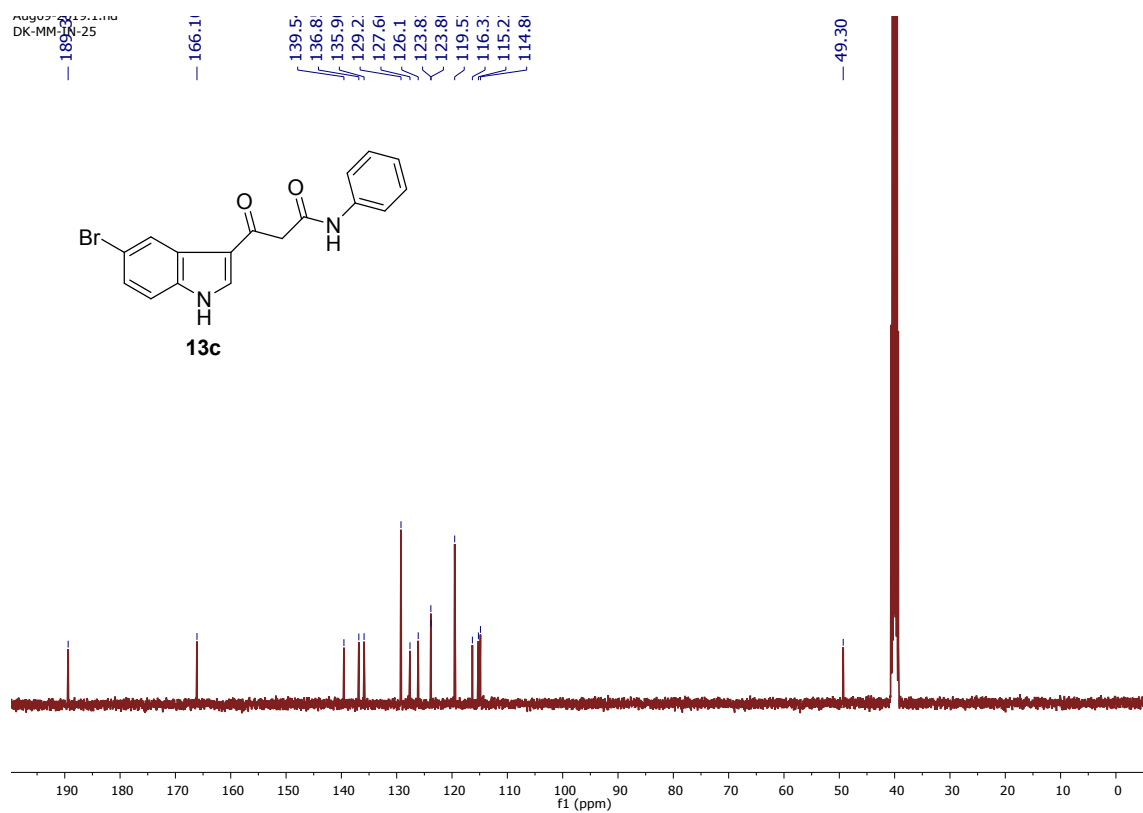

### HRMS Spectrum of 13c

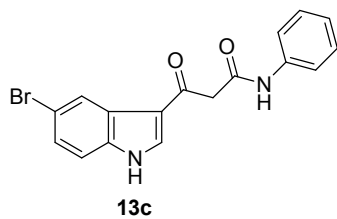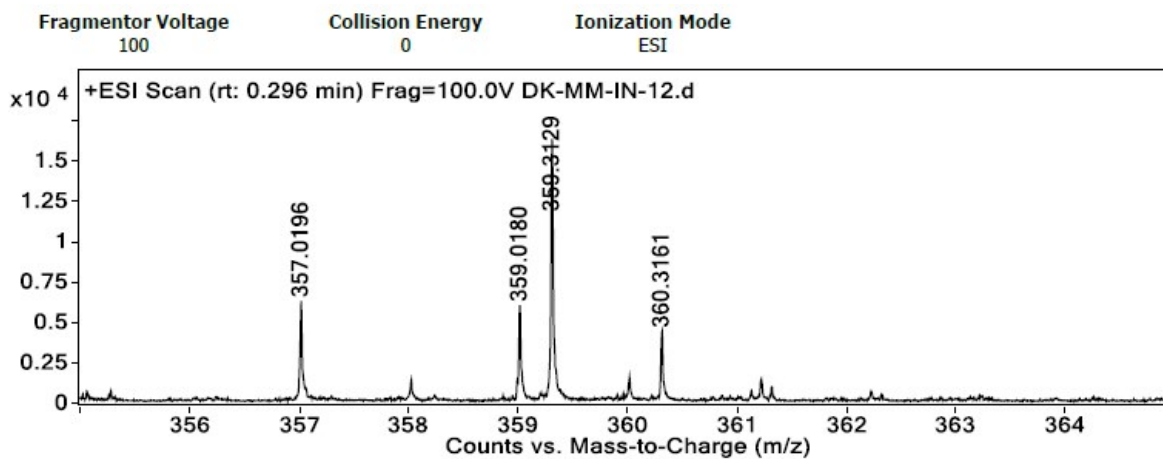

### <sup>1</sup>H NMR spectrum of 13d

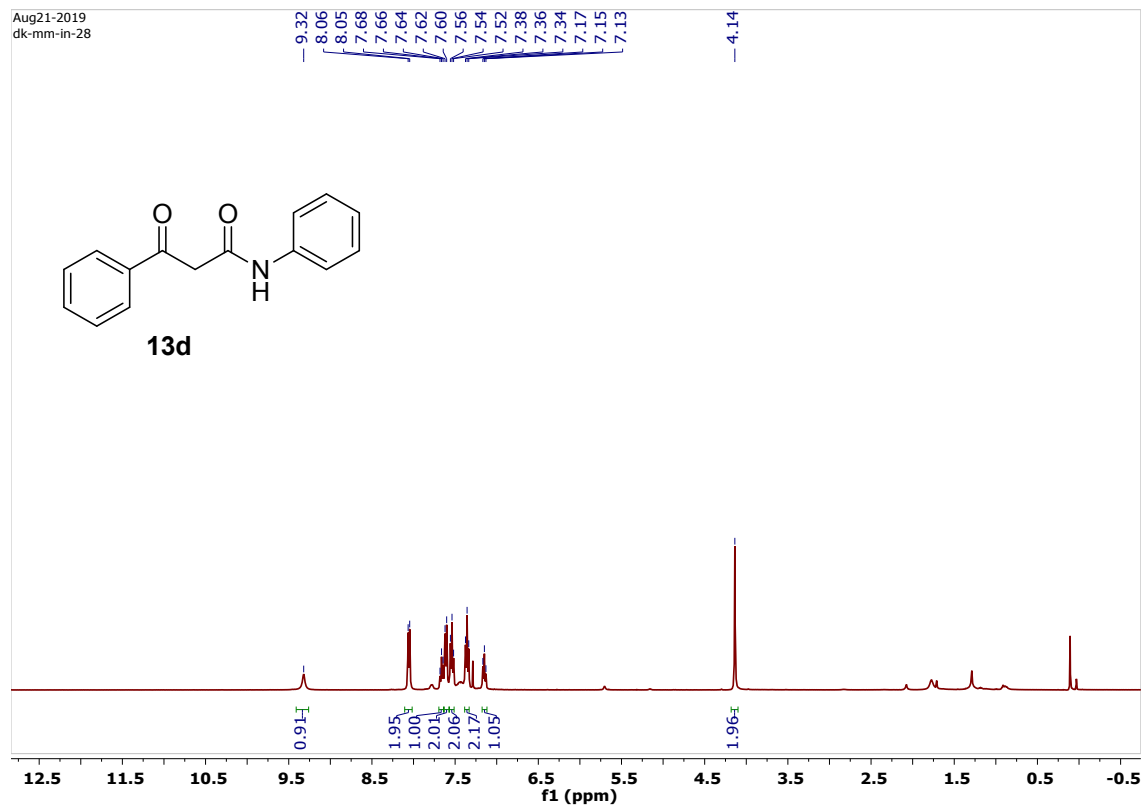

### <sup>13</sup>C NMR spectrum of 13d

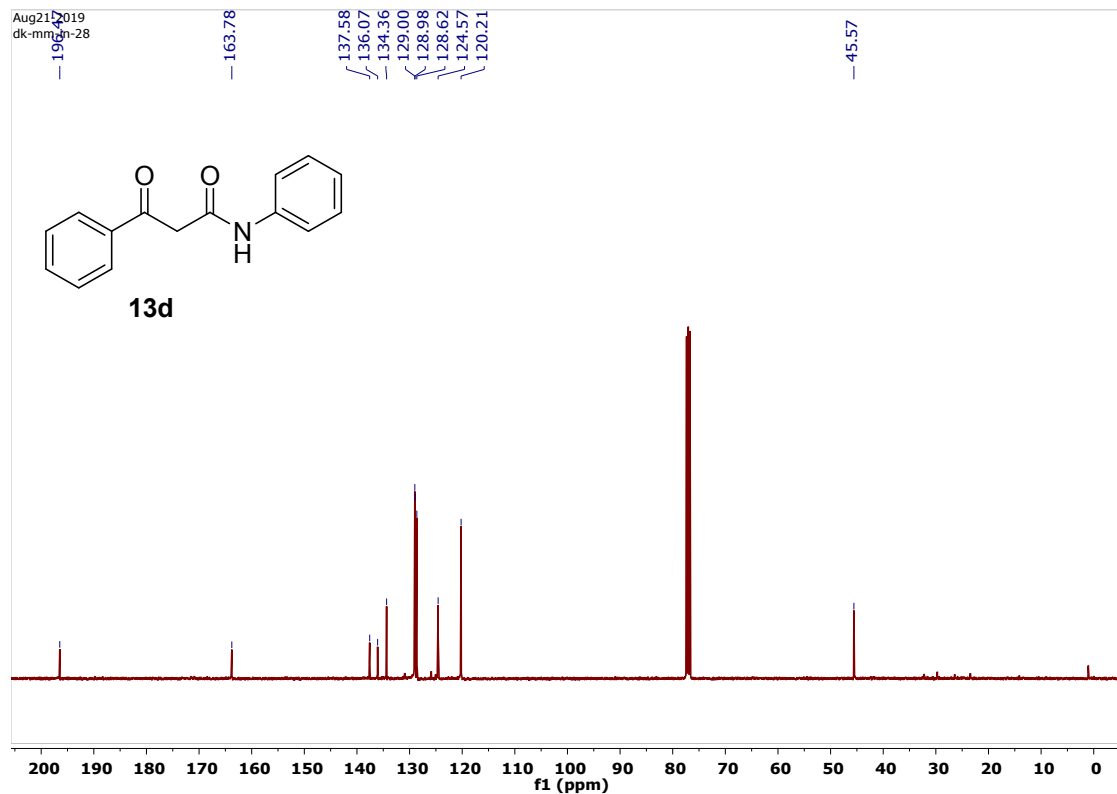

### <sup>1</sup>H NMR spectrum of 14a

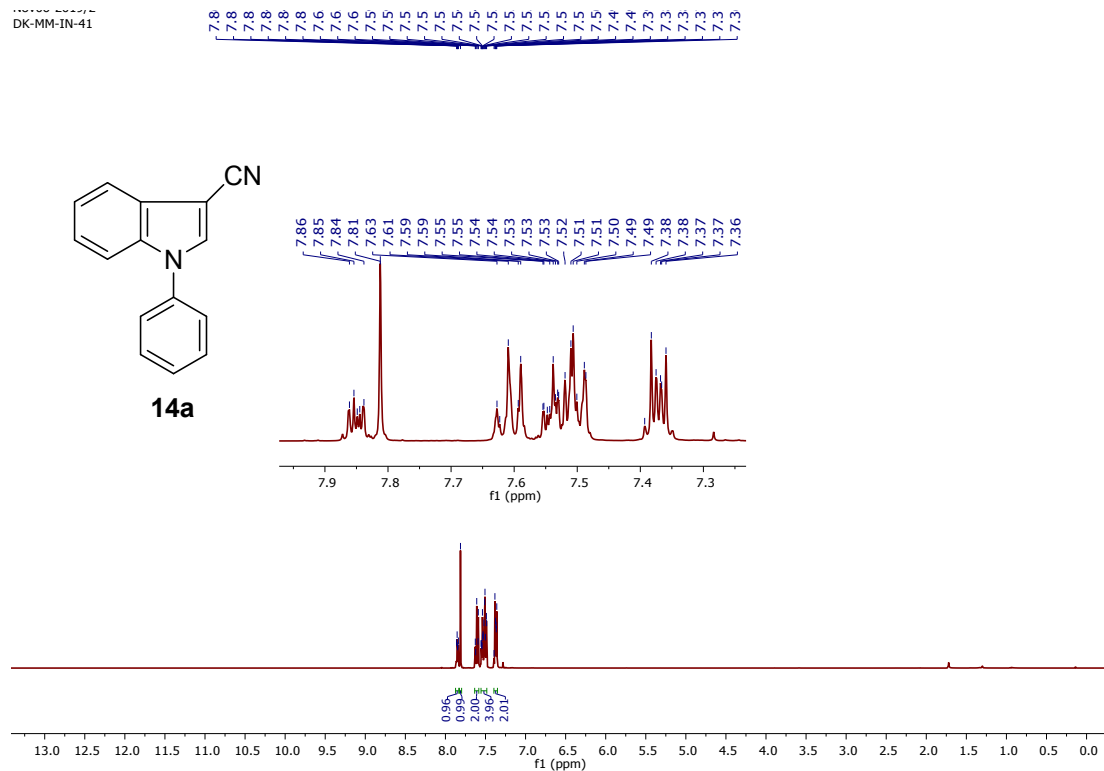

### <sup>13</sup>C NMR spectrum of 14a

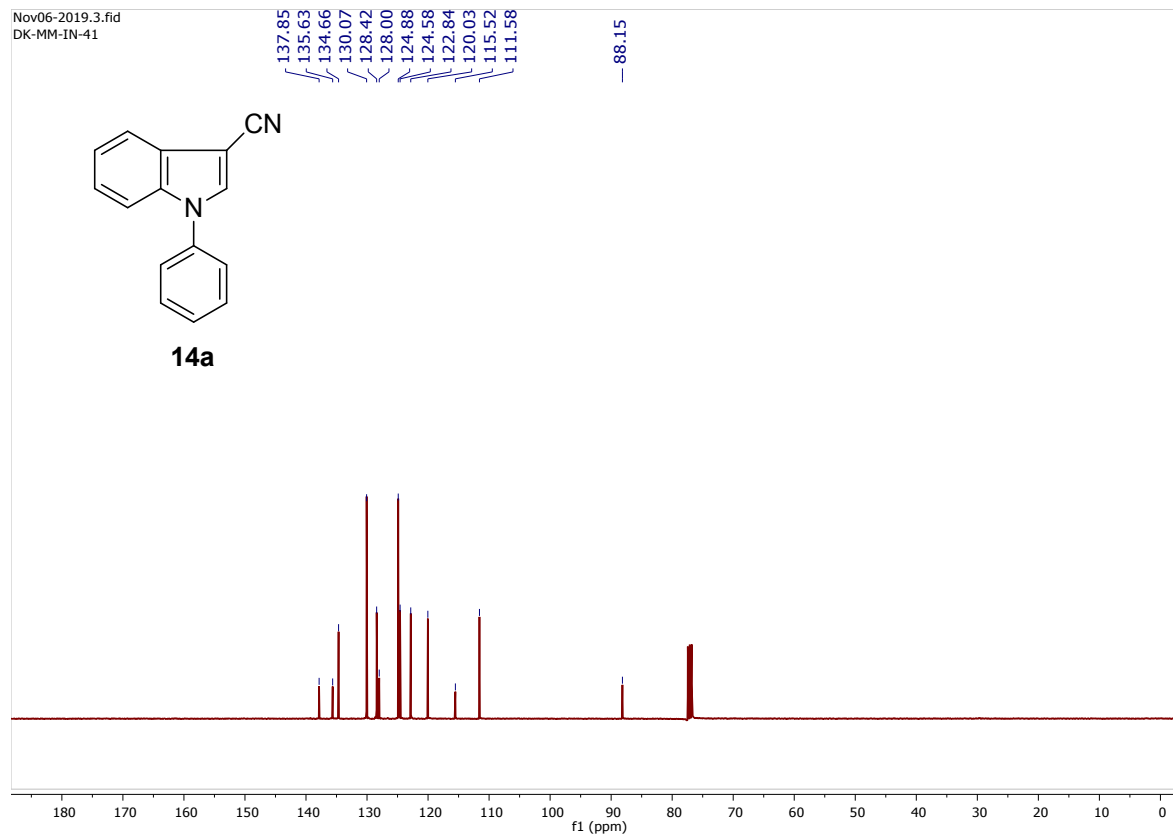

### HRMS Spectrum of 14a

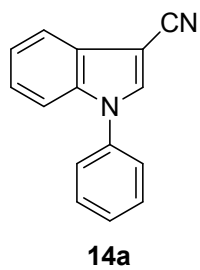

### MS Zoomed Spectrum

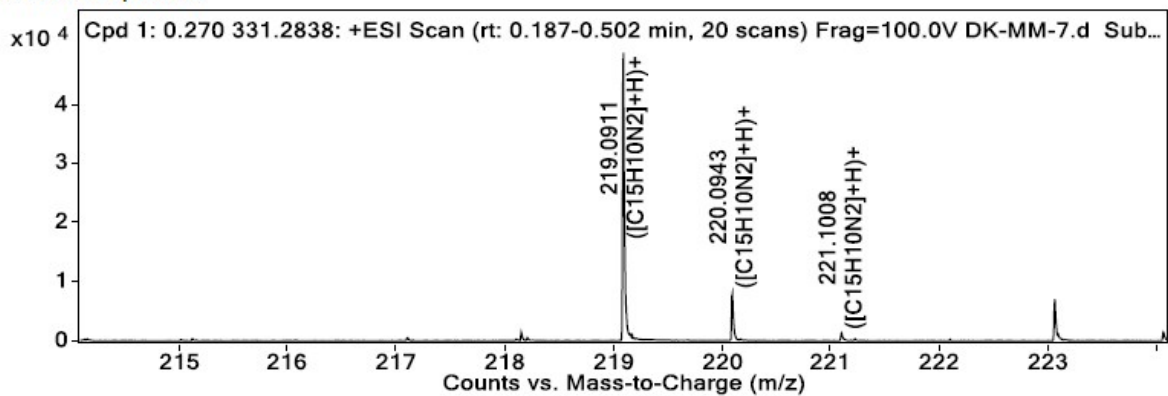

# <sup>1</sup>H NMR spectrum of 14b

Nov13-2019/2  
DK-MM-IN-43

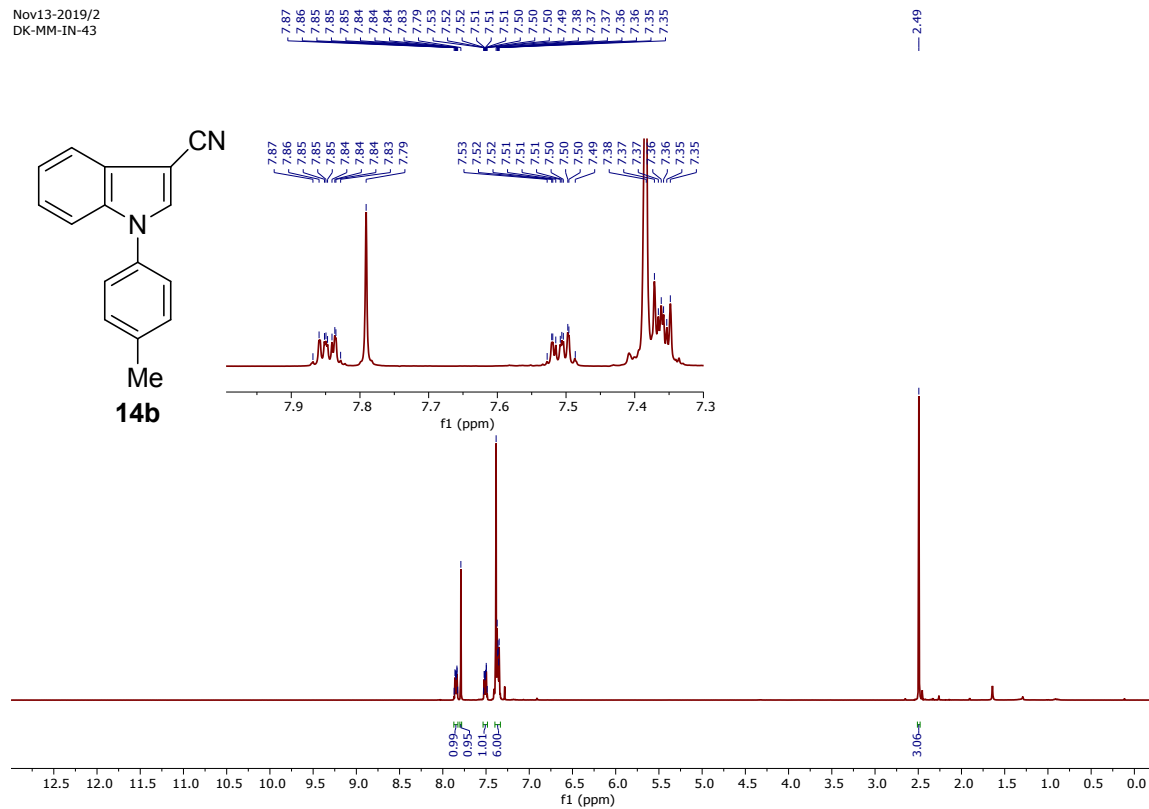

# <sup>13</sup>C NMR spectrum of 14b

Nov13-2019/3  
DK-MM-IN-43

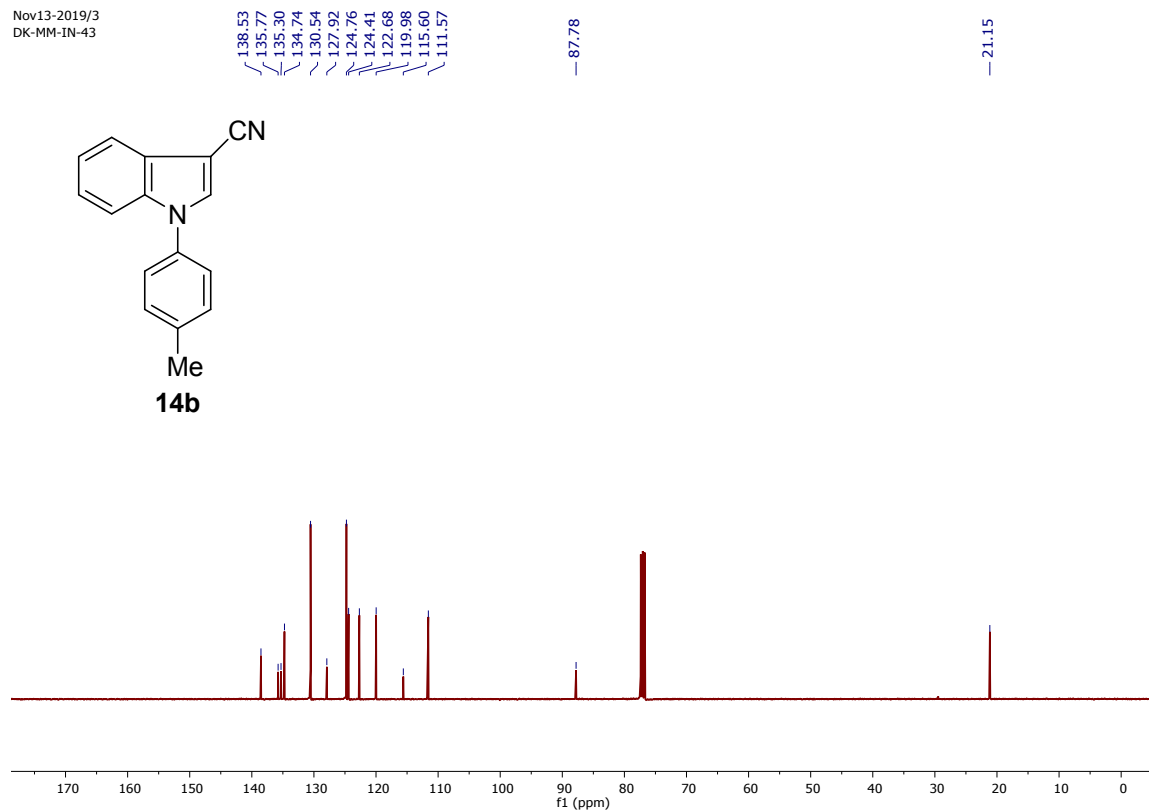



## HRMS Spectrum of 14b

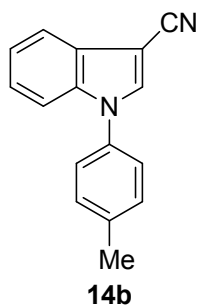

### MS Zoomed Spectrum

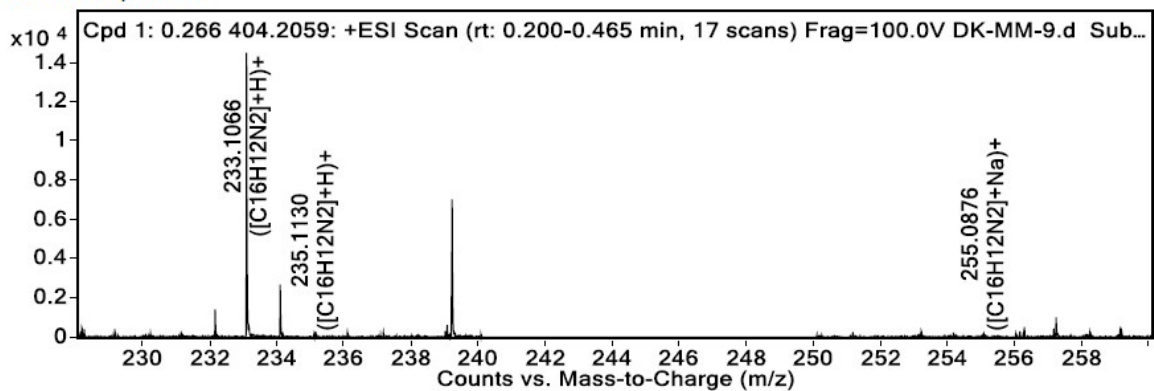

## <sup>1</sup>H NMR spectrum of 14c

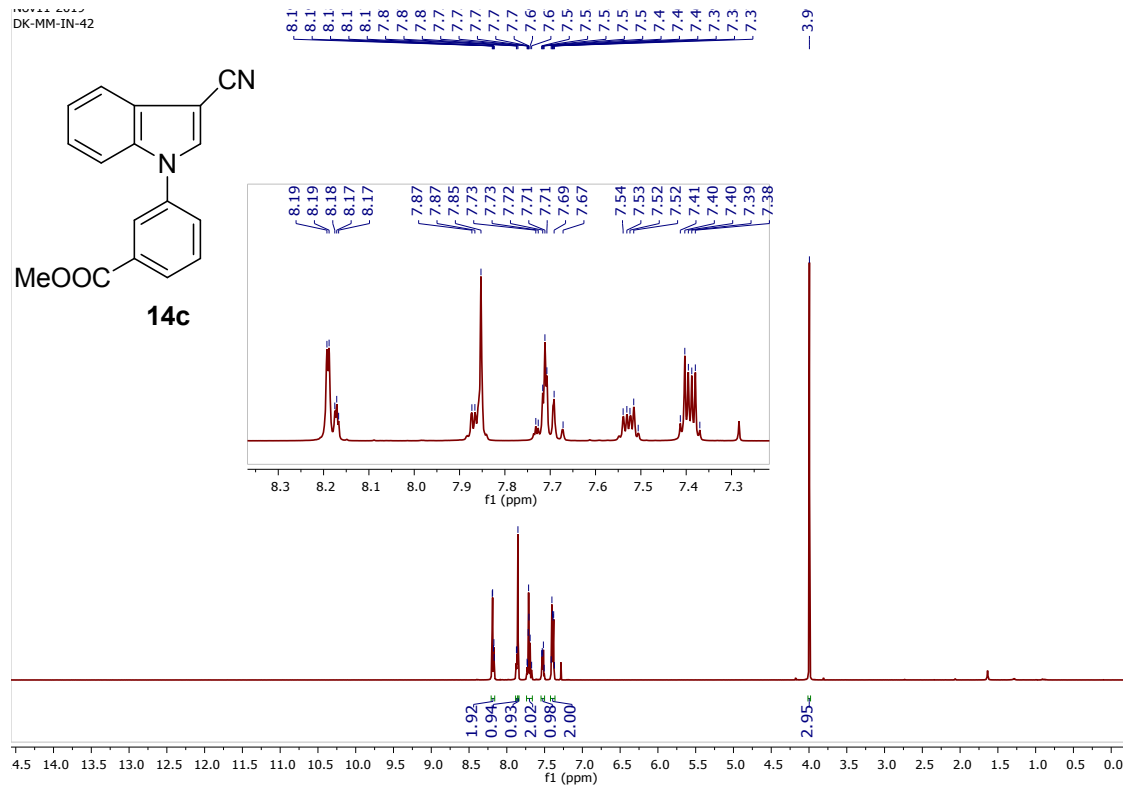

### <sup>13</sup>C NMR spectrum of 14c

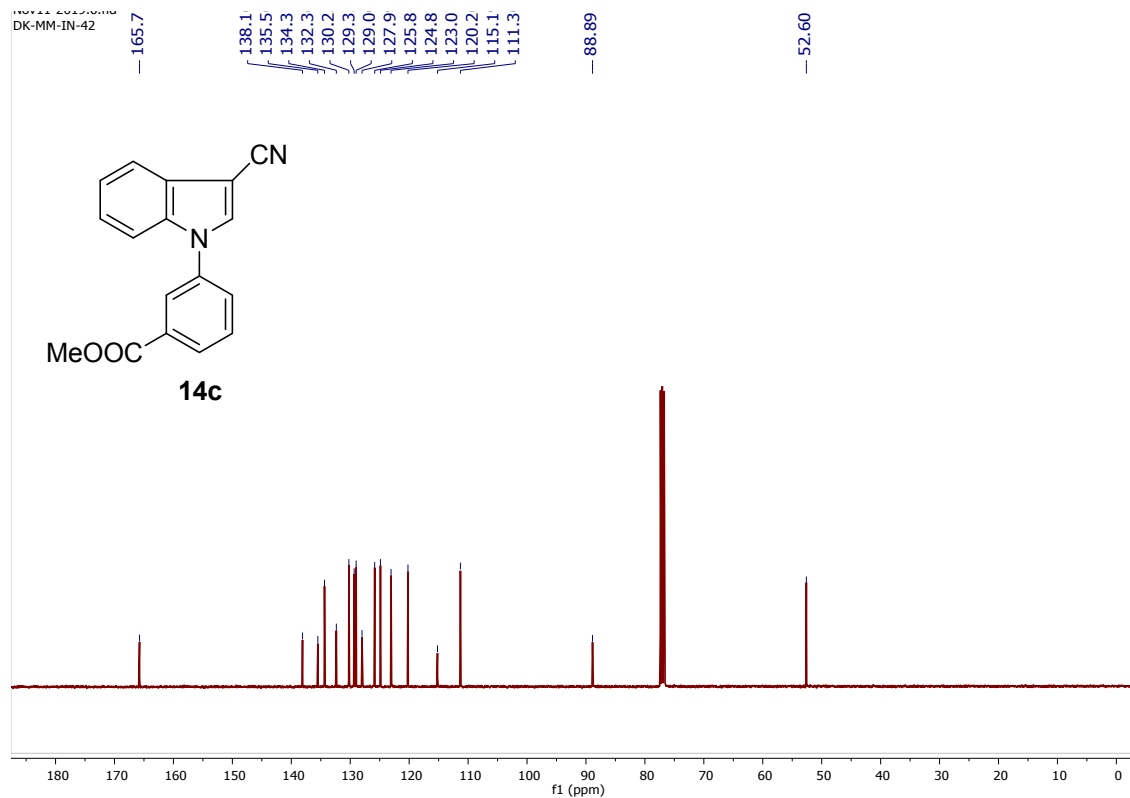

### HRMS Spectrum of 14c

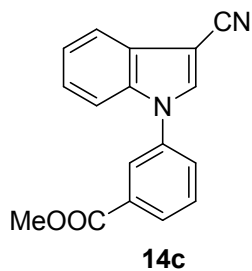

### MS Zoomed Spectrum

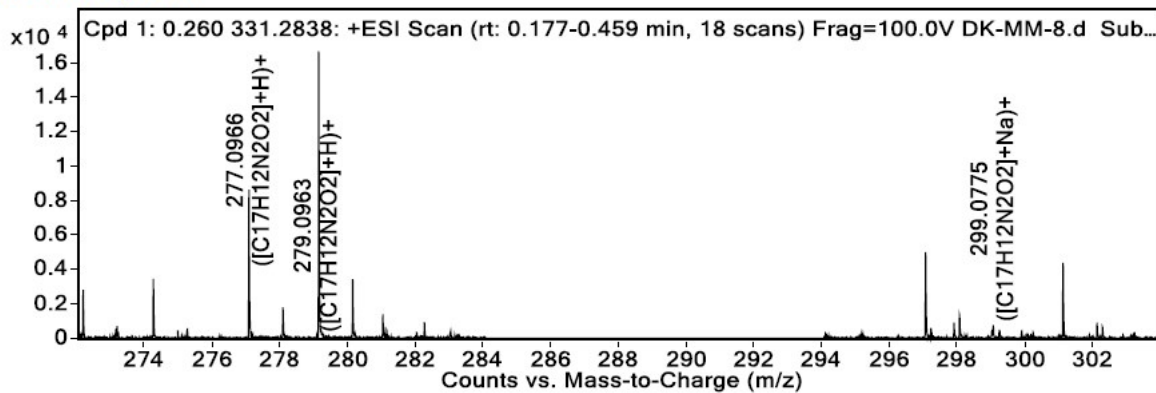

### <sup>1</sup>H NMR spectrum of 15

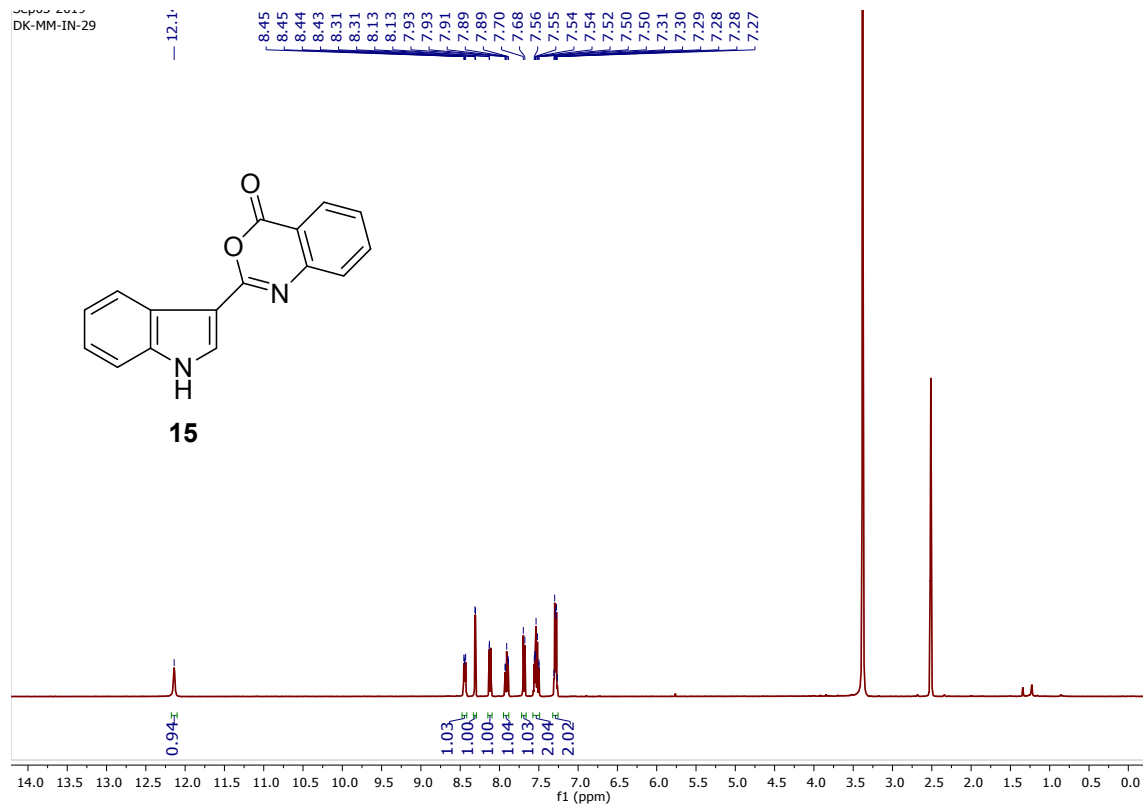

### <sup>13</sup>C NMR spectrum of 15

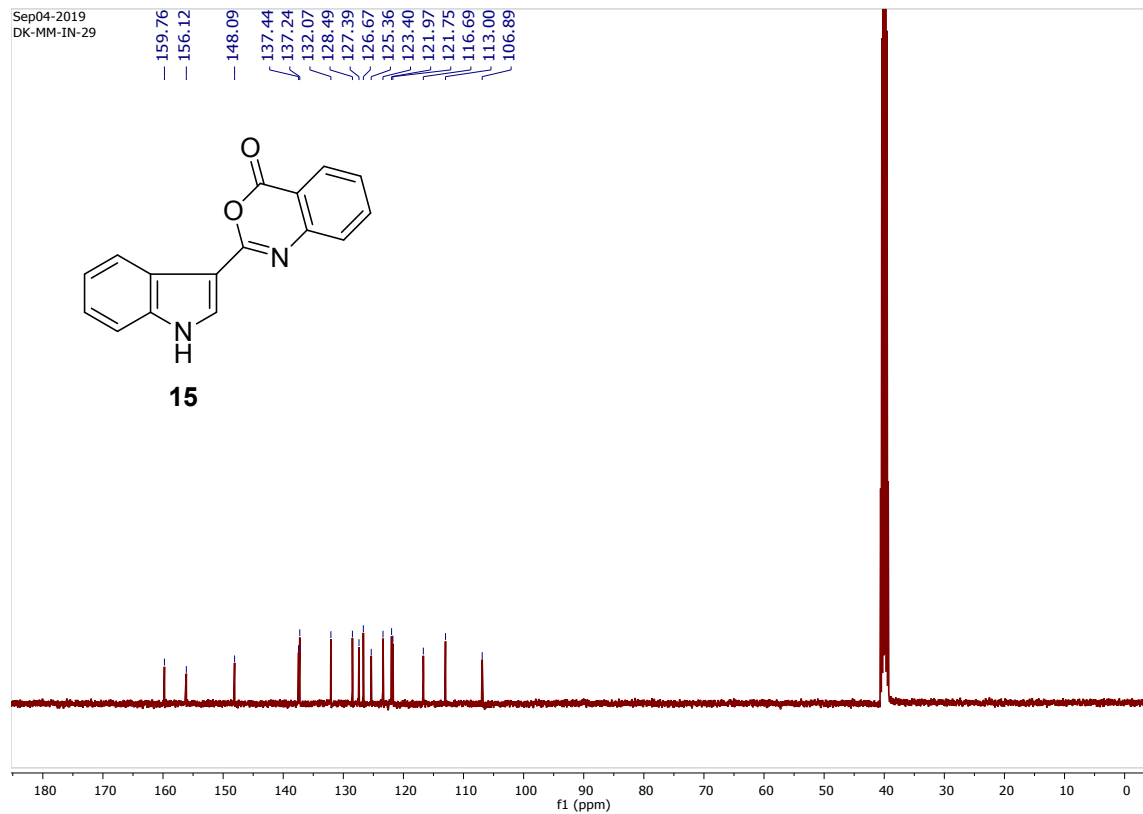

## HRMS Spectrum of 15

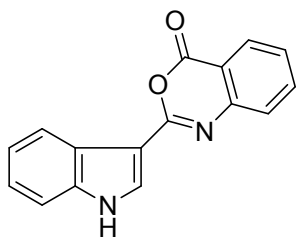

**15**

MS Zoomed Spectrum

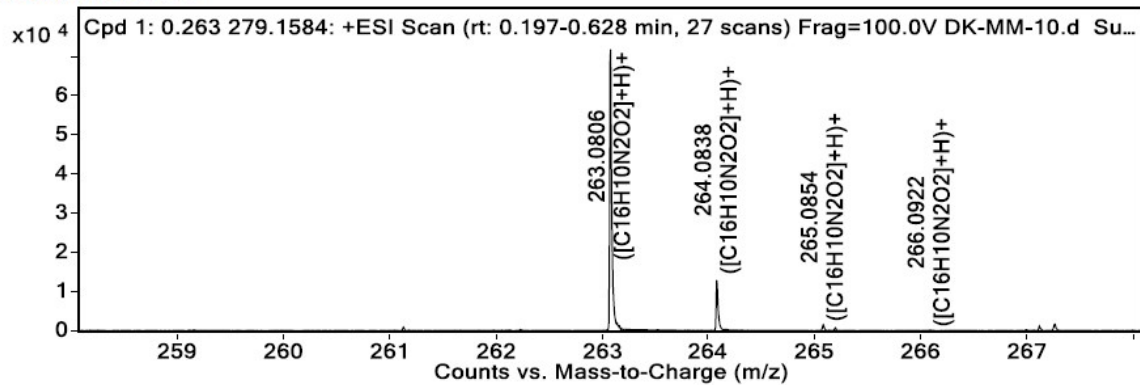

## <sup>1</sup>H NMR spectrum of 16

Jun02-2020/3  
DK-MM-1N-50

8.08  
7.72  
7.70  
7.43  
7.41  
7.27  
7.24  
7.22  
7.21  
7.21  
7.18  
7.16  
6.79  
6.77  
6.75  
6.73

4.52

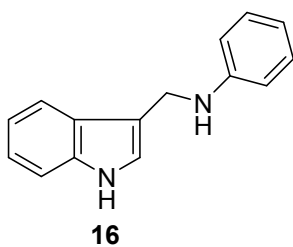

**16**

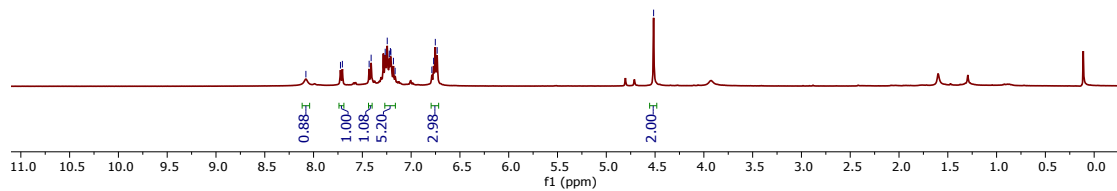

## <sup>13</sup>C NMR spectrum of 16

Jun03-2020/1  
DK-MM-IN-50

— 148.56  
— 136.44  
129.26  
126.74  
122.70  
122.42  
119.78  
119.01  
117.39  
114.03  
112.89  
111.27

— 40.08

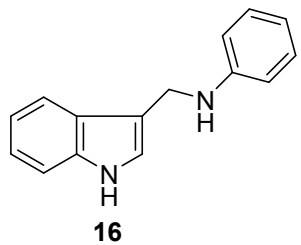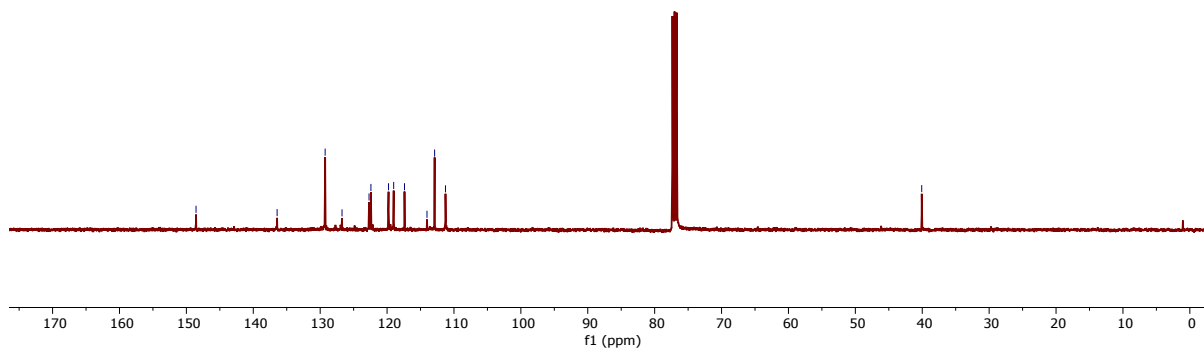

### <sup>1</sup>H NMR spectrum of 17

May18-2020/3  
DK-MM-IN-47

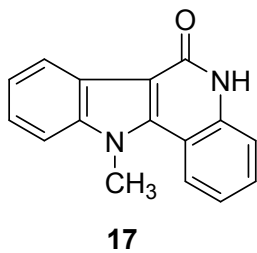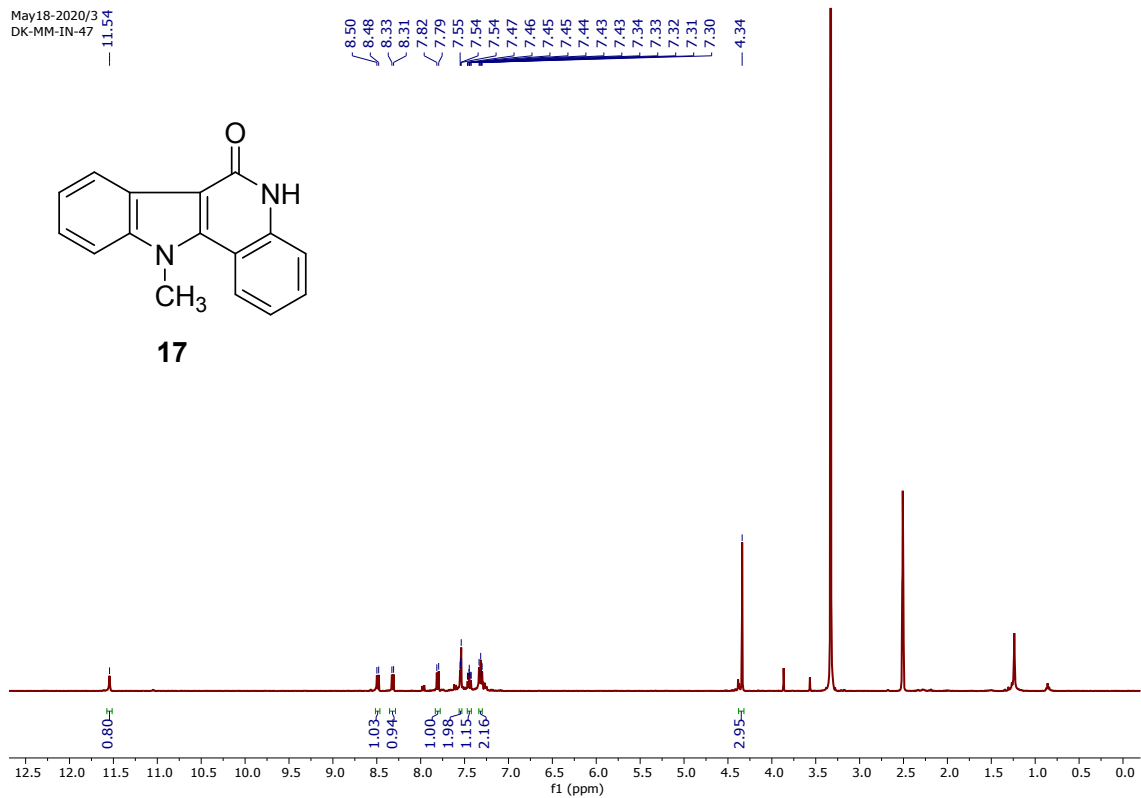

### <sup>13</sup>C NMR spectrum of 17

May19-2020/3  
DK-MM-IN-48

140.42  
139.83  
138.92  
129.33  
124.52  
123.84  
123.62  
121.95  
121.79  
121.32  
116.92  
113.04  
110.66  
107.42

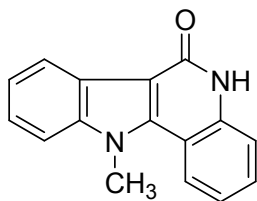

17

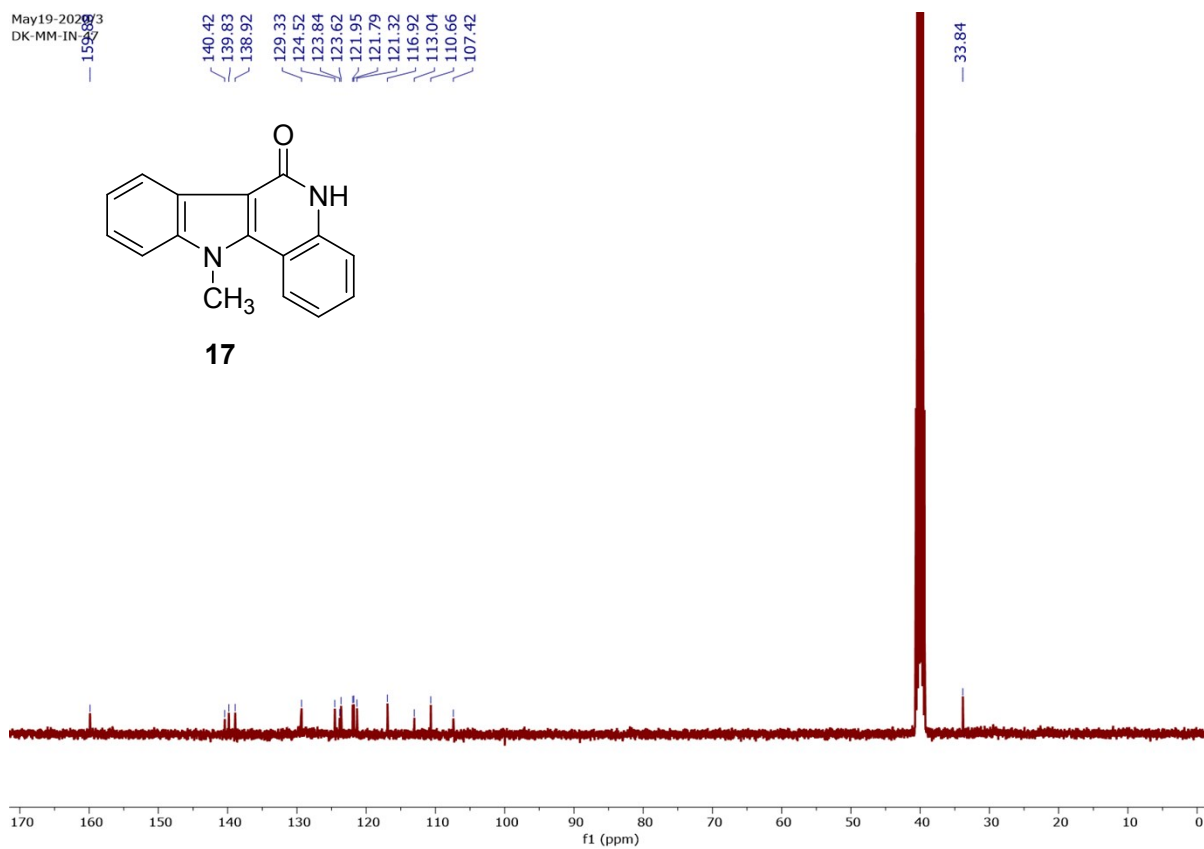

### <sup>1</sup>H NMR spectrum of 18

May25-2020/2  
DK-MM-IN-48

8.57  
7.78  
7.76  
7.67  
7.65  
7.60  
7.58  
7.56  
7.54  
7.52  
7.45  
7.43  
7.41  
7.41  
7.39  
7.37  
4.34  
3.80

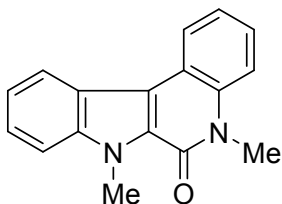

18

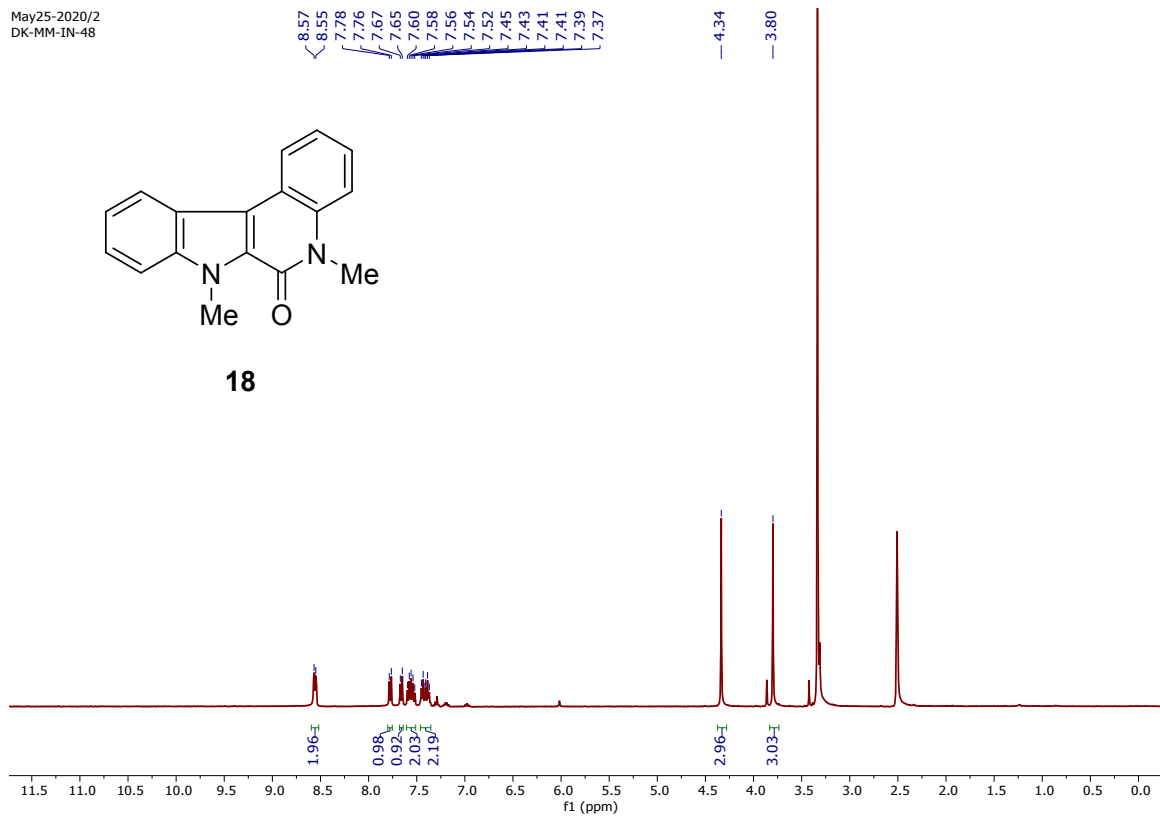

### <sup>13</sup>C NMR spectrum of 18

May26-2020/3  
DK-MM-IN-48

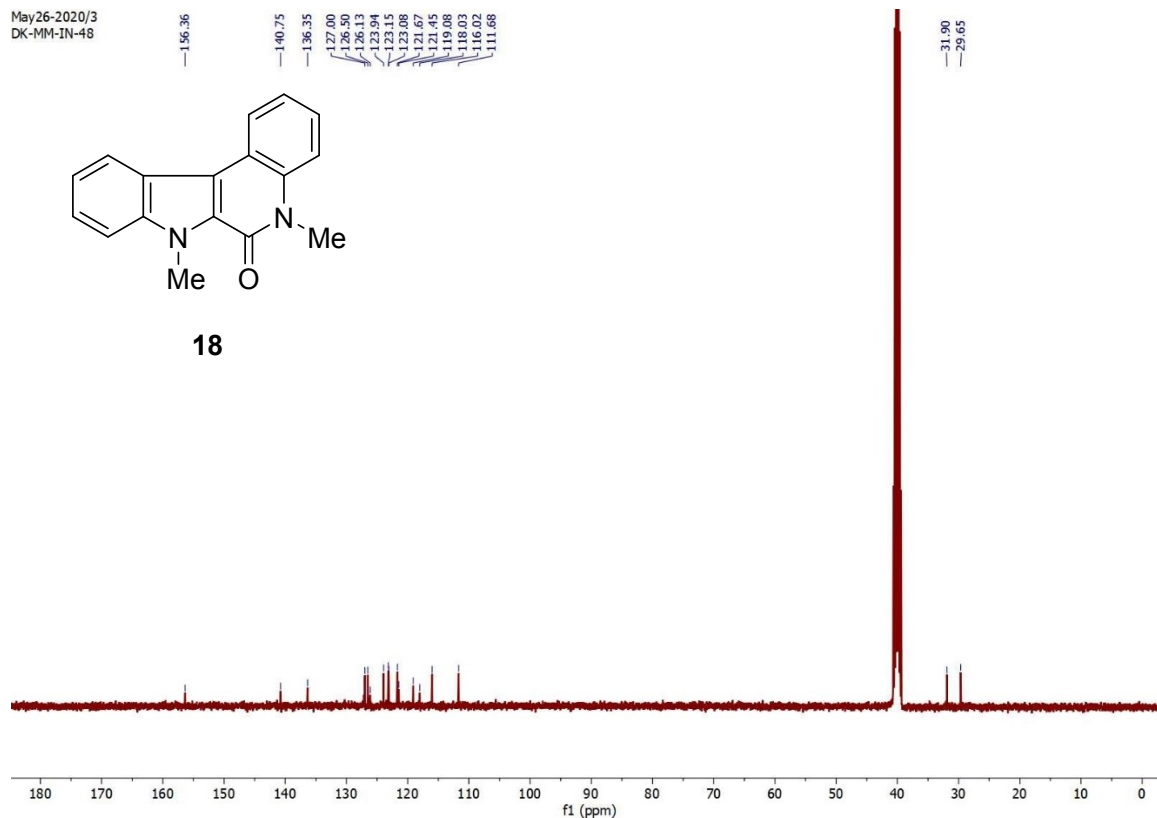

## 5. References

- (a) J. Slaett, I. Romero and J. Bergman, *Synthesis*, 2004, **2004**, 2760; (b) N. Soldatova, P. Postnikov, O. Kukurina, V. V. Zhdankin, A. Yoshimura, T. Wirth and M. S. Yusubov, *ChemistryOpen*, 2017, **6**, 18; (c) M. Zhu, N. Jalalian and B. Olofsson, *Synlett*, 2008, **2008**, 592; (d) E. Lindstedt, M. Reitti and B. Olofsson, *J. Org. Chem.*, 2017, **82**, 11909.
- (a) D. Kumar, M. K. Narayanam, K. H. Chang and K. Shah, *Chem Biol Drug Des*, 2011, **77**, 182; (b) D. Kumar, N. M. Kumar, K.-H. Chang, R. Gupta and K. Shah, *Bioorg. Med. Chem. Lett.*, 2011, **21**, 5897.
- (a) H. Pessoa-Mahana, I. Cuevas M, C. D. Pessoa-Mahana, R. Araya-Maturana, I. A. Fajardo and C. Saitz Barría, *J. Chil. Chem. Soc.*, 2011, **56**, 866; (b) C. Chay, R. Cansino, C. Pinzón, R. Torres-Ochoa and R. Martínez, *Mar. Drugs*, 2014, **12**, 1757.
- D. Hadjipavlou-Litina, G. E. Magoulas, M. Krokidis and D. Papaioannou, *Eur. J. Med. Chem.*, 2010, **45**, 298.
- P. Peterson, J. Wolf III and C. Niemann, *J. Org. Chem.*, 1958, **23**, 303.
- J. Zaletova, M. Dzurilla, P. Kutschy, P. Pazdera, V. Kováčik, J. Aldöfki and S. Bekešová, *Collect. Czech. Chem. Commun.*, 2004, **69**, 453.
- P. Caramella, A. C. Corsico, A. Corsaro, D. Del Monte and F. M. Albin, *Tetrahedron*, 1982, **38**, 173.
- S. Mahboobi, S. Teller, H. Pongratz, H. Hufsky, A. Sellmer, A. Botzki, A. Uecker, T. Beckers, S. Baasner and C. Schächtele, *J. Med. Chem.*, 2002, **45**, 1002.

9. (a) A. Chakraborty, S. Majumdar and D. K. Maiti, *Tetrahedron Lett.*, 2016, **57**, 3298; (b) H. O. M. Satu, S. Komatsu and T. Kato, *Chem. Pharm. Bull.*, 1984, **32**, 3848.
10. Q. Wu, Y. Luo, A. Lei and J. You, *J. Am. Chem. Soc.*, 2016, **138**, 2885.
11. J. J. Mason, J. Bergman and T. Janosik, *J. Nat. Prod.*, 2008, **71**, 1447.
12. Y.-H. He, Y. Xiang, D.-C. Yang and Z. Guan, *Green Chem.*, 2016, **18**, 5325.
13. (a) N. Wang, K. Imai, C.-Q. Pang, M.-q. Wang, M. Yonezawa, Y. Zhang, J. Nokami and T. Inokuchi, *Bull. Chem. Soc. Jpn.*, 2013, **86**, 864; (b) J. Bourdais and A. Lorre, *J. Heterocycl. Chem.*, 1975, **12**, 1111.
14. Z. Chen and X. Wang, *Org. Biomol. Chem.*, 2017, **15**, 5790.
